# Supplementary material
Source: PubMed Central journal article supplement (PMC3663483)
Supplement: NIHMS472851-supplement-Supplementary_Data_Figures.pdf [file NIHMS472851-supplement-Supplementary_Data_Figures.pdf]

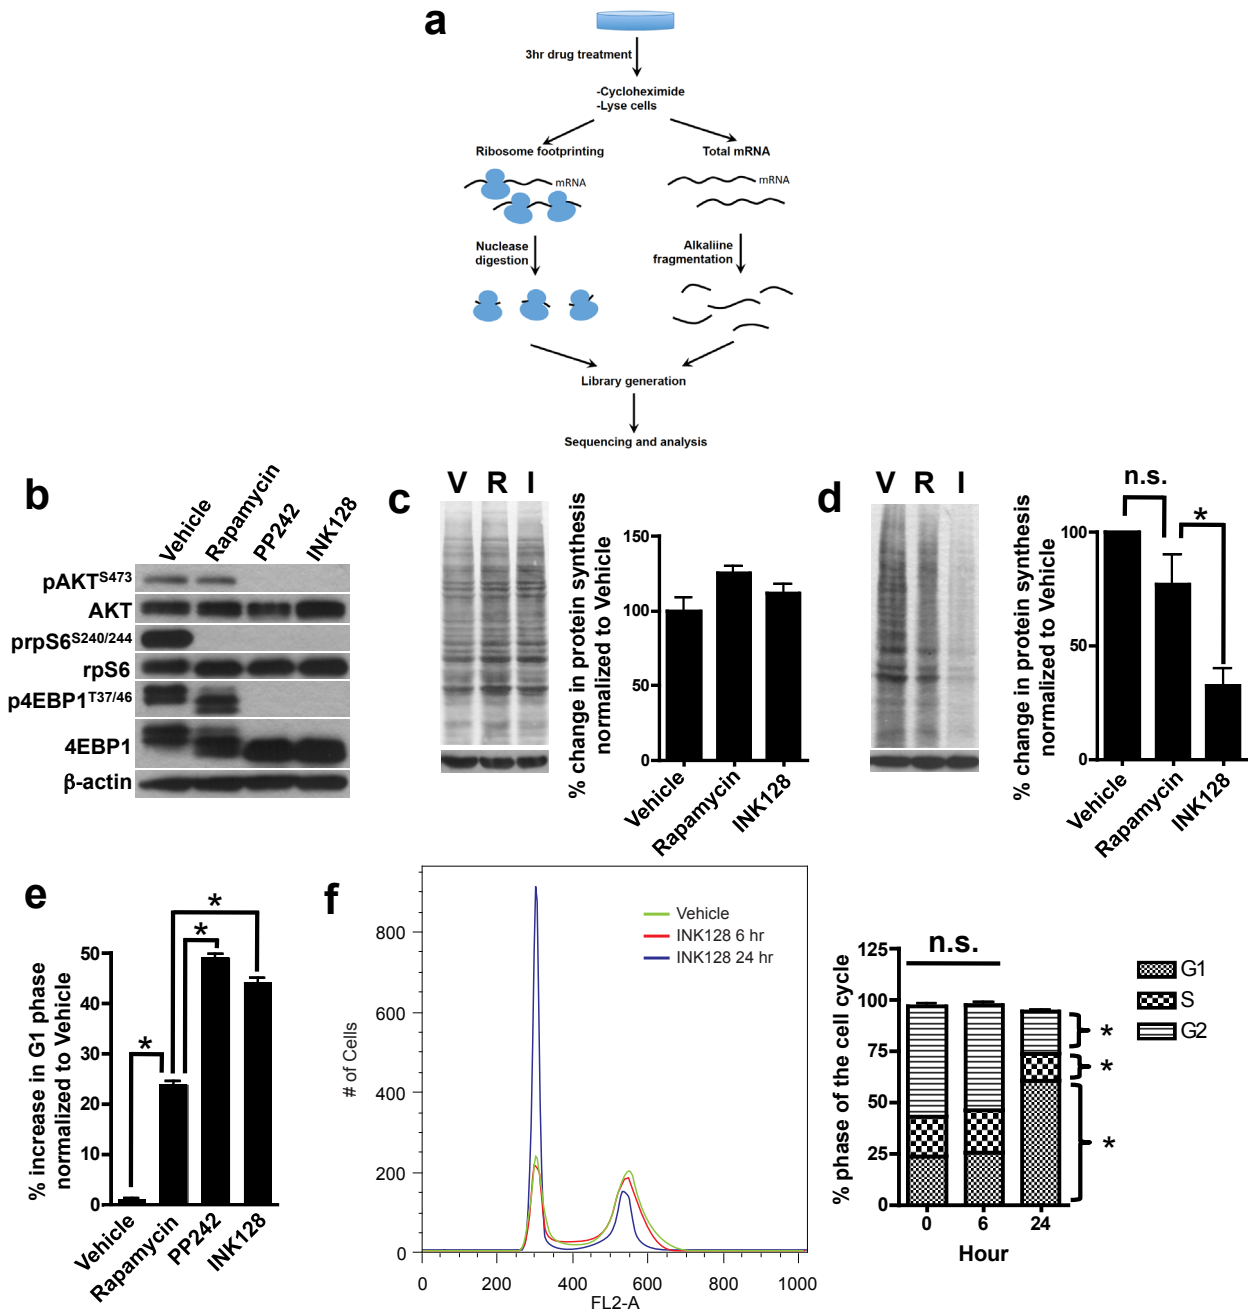

**Supplementary Figure 1. Validation of mTOR inhibitors in PC3 prostate cancer cell line.** (a) Schematic of ribosome profiling of human prostate cancer cells. (b) Representative western blot analysis from 3 independent experiments of PC3 prostate cancer cells treated with rapamycin (50 nM), PP242 (2.5 μM), or INK128 (200 nM) for 3 hours. (c) Representative [<sup>35</sup>S]-methionine incorporation in PC3 cells after 6-hour treatment with rapamycin (50 nM) or INK128 (200 nM) (left panel). Quantification of [<sup>35</sup>S]-methionine incorporation (right panel, n = 4, mean ± SEM). (d) Representative [<sup>35</sup>S]-methionine incorporation in PC3 cells after 14-hour treatment with rapamycin (50 nM) or INK128 (200 nM) (left panel). Quantification of [<sup>35</sup>S]-methionine incorporation (right panel, n = 4, mean ± SEM, \* P<0.05 ANOVA). (e) Cell cycle analysis of PC3 cells after treatment with rapamycin (50 nM), PP242 (2.5 μM), or INK128 (200 nM) for 48 hours (mean ± SEM, n = 3, \* P<0.001 ANOVA). (f) Cell cycle analysis of PC3 cells after 0-, 6-, or 24-hour treatment with INK128 (200 nM) (mean ± SEM, n = 3, \* P<0.001 ANOVA). n.s. – not statistically significant. V = vehicle, R = rapamycin, I = INK128.

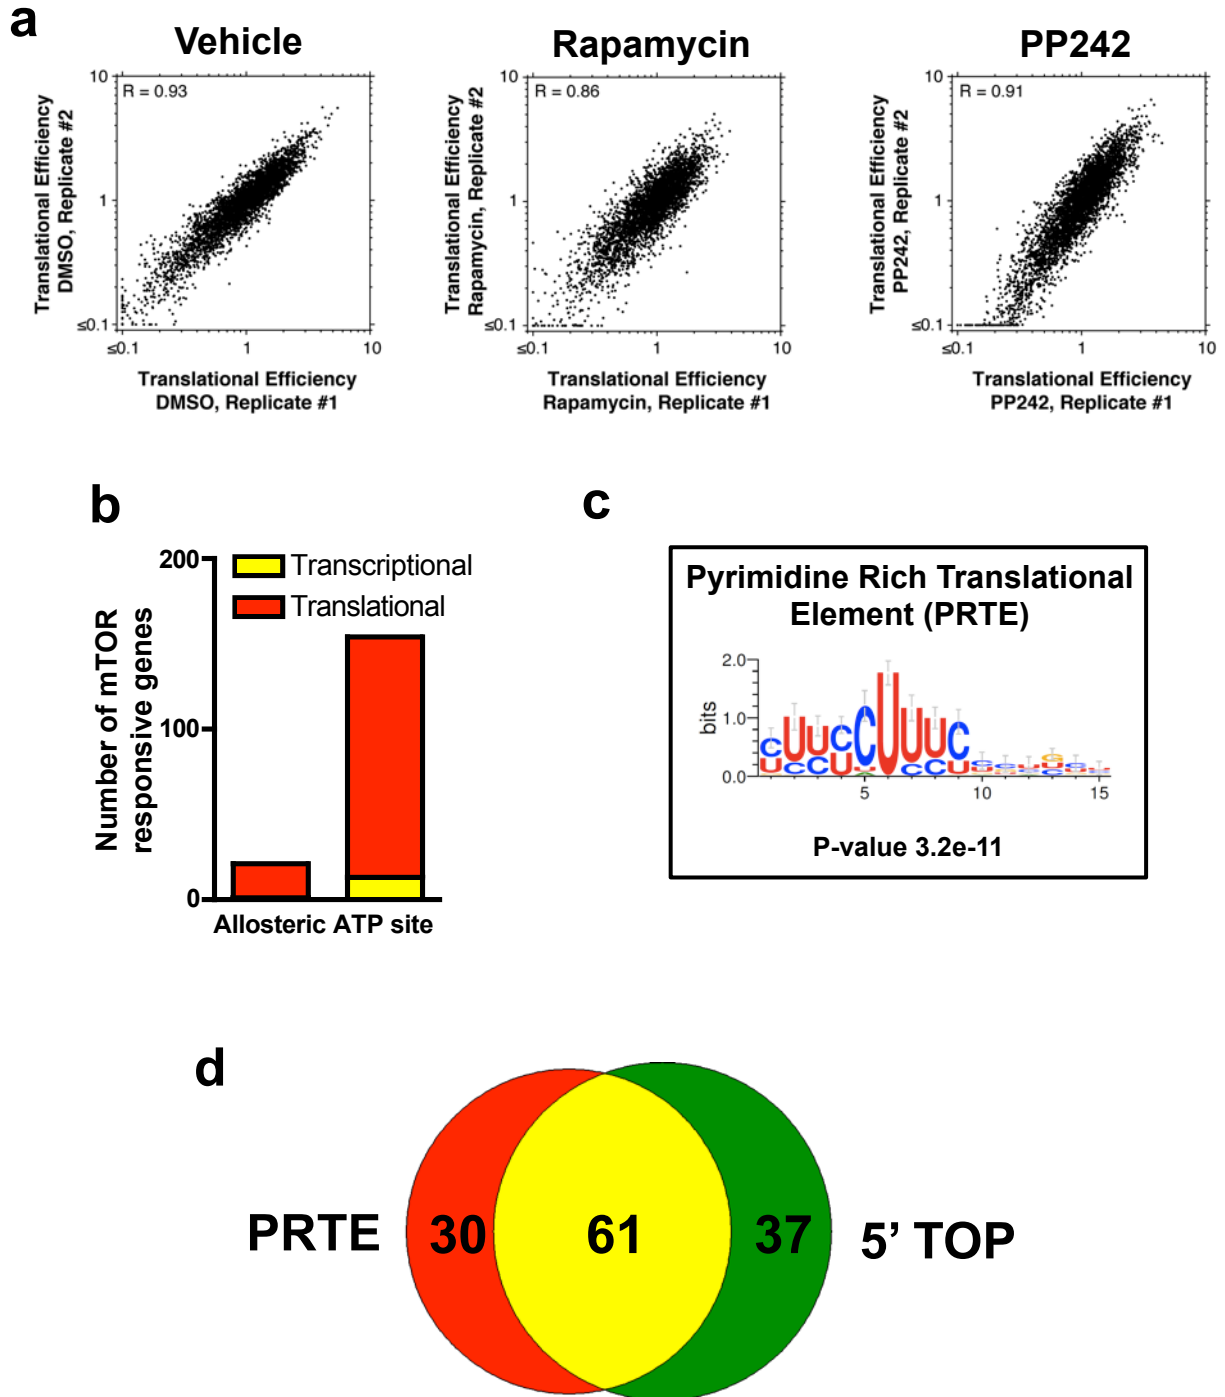

**Supplementary Figure 2. Inter-experimental correlation of ribosome profiling per treatment condition and tally of mTOR responsive genes. The Pyrimidine Rich Translational Element (PRTE) within the 5' UTRs of mTOR sensitive mRNAs.** (a) Correlation plots from 2 independent ribosome profiling experiments after a 3-hour treatment with rapamycin (50 nM) or PP242 (2.5  $\mu$ M). (b) Number of translationally and transcriptionally regulated mRNA targets of mTOR after 3-hour drug treatments. (c) Pyrimidine Rich Translational Element (PRTE) present within the 5' UTRs of 63% of mTOR responsive translationally regulated mRNAs. (d) Venn diagram of the number of mTOR sensitive genes that possess a PRTE (red), 5' TOP (green), or both (yellow).

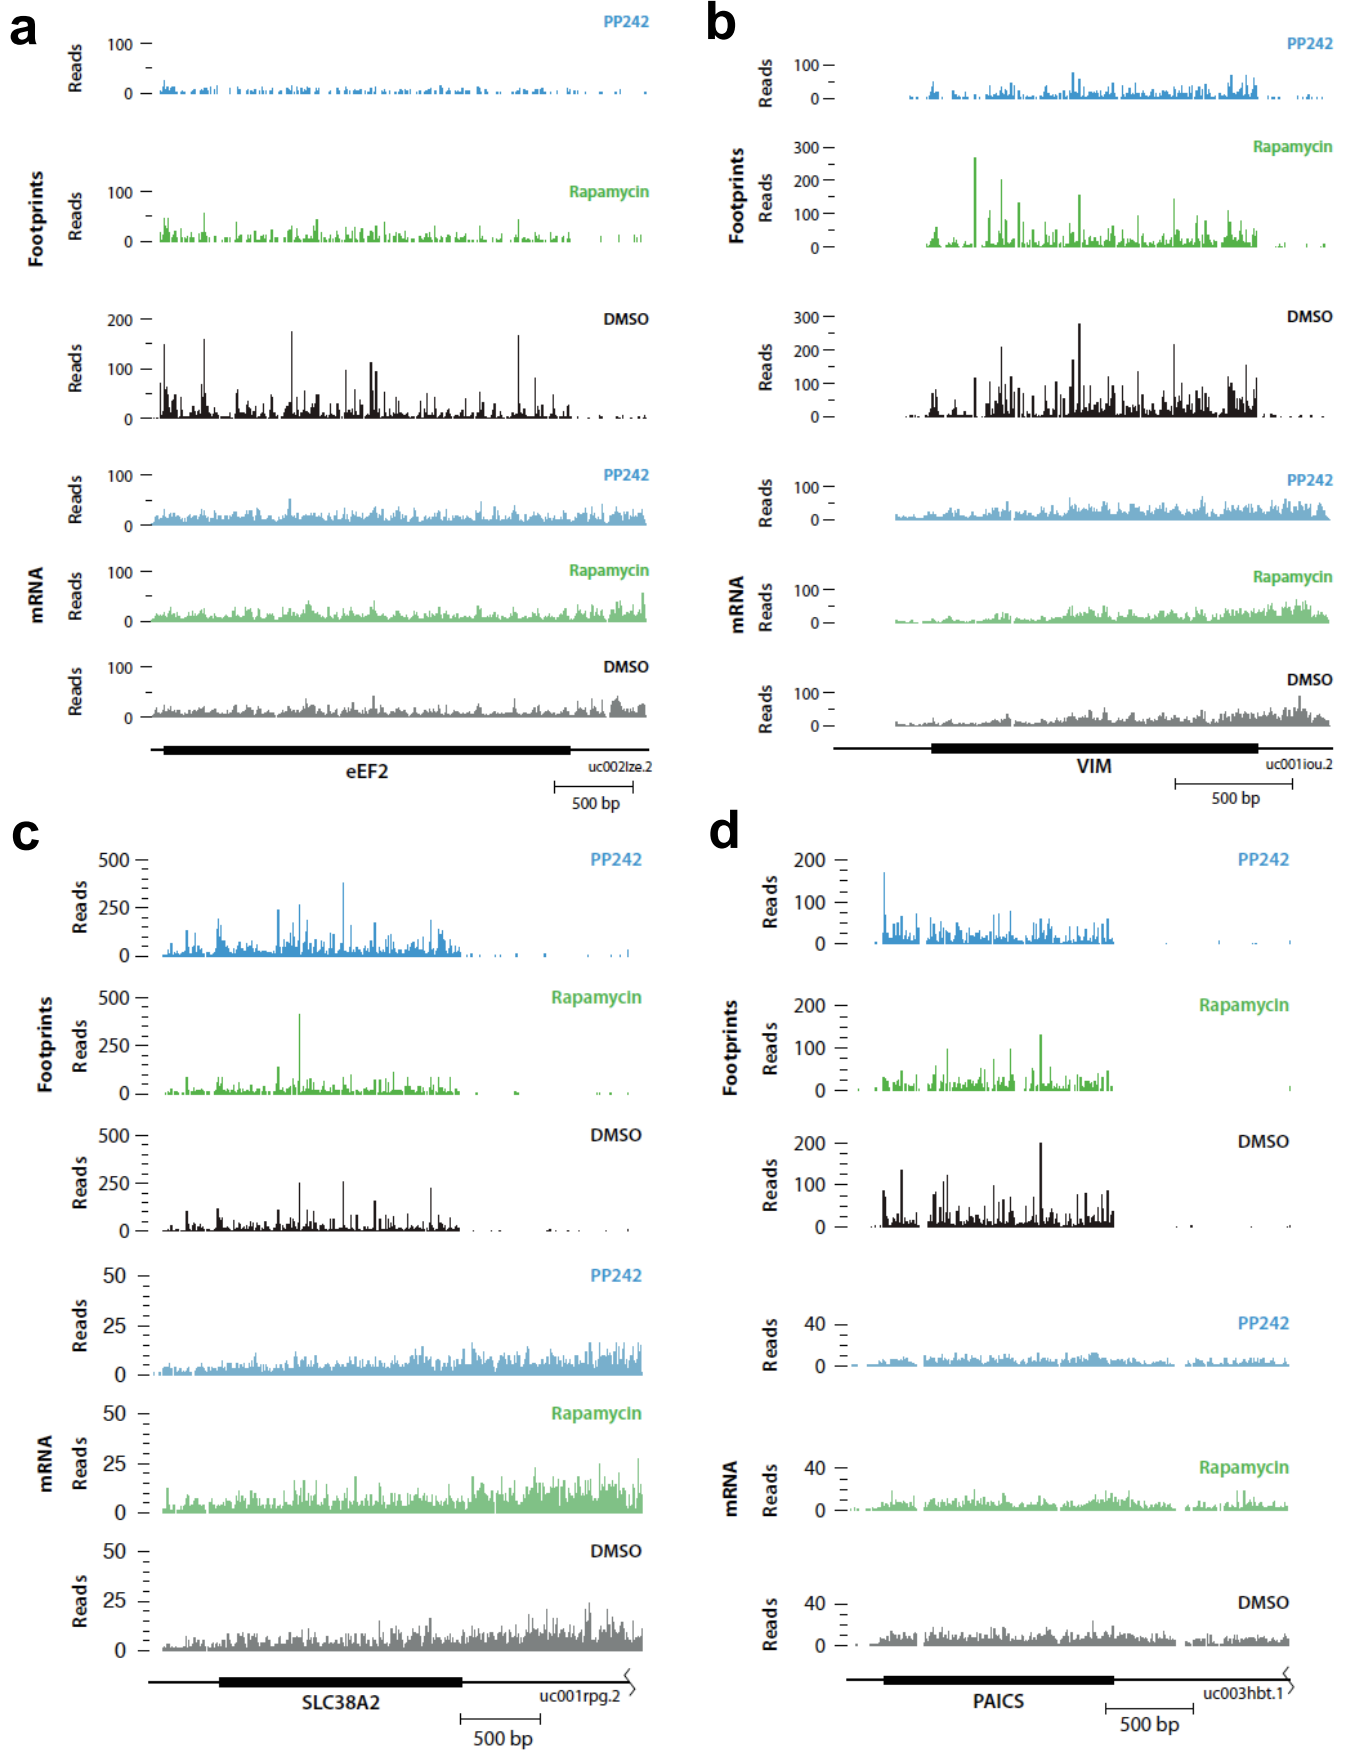

**Supplementary Figure 3. Read count profiles for *eEF2*, vimentin, *SLC38A2*, and *PAICS*.** (a) Ribosome footprint and RNA-Seq profiles for *eEF2*. Read count profiles are shown for each nucleotide position in the uc002lze.2 transcript, with the *eEF2* coding sequence marked. Ribosome footprints were assigned to specific A site nucleotide positions based on their length. (b) Ribosome footprint and RNA-Seq profiles for vimentin. (c) Ribosome footprint and RNA-Seq profiles for *SLC38A2*. (d) Ribosome footprint and RNA-Seq profiles for *PAICS*.

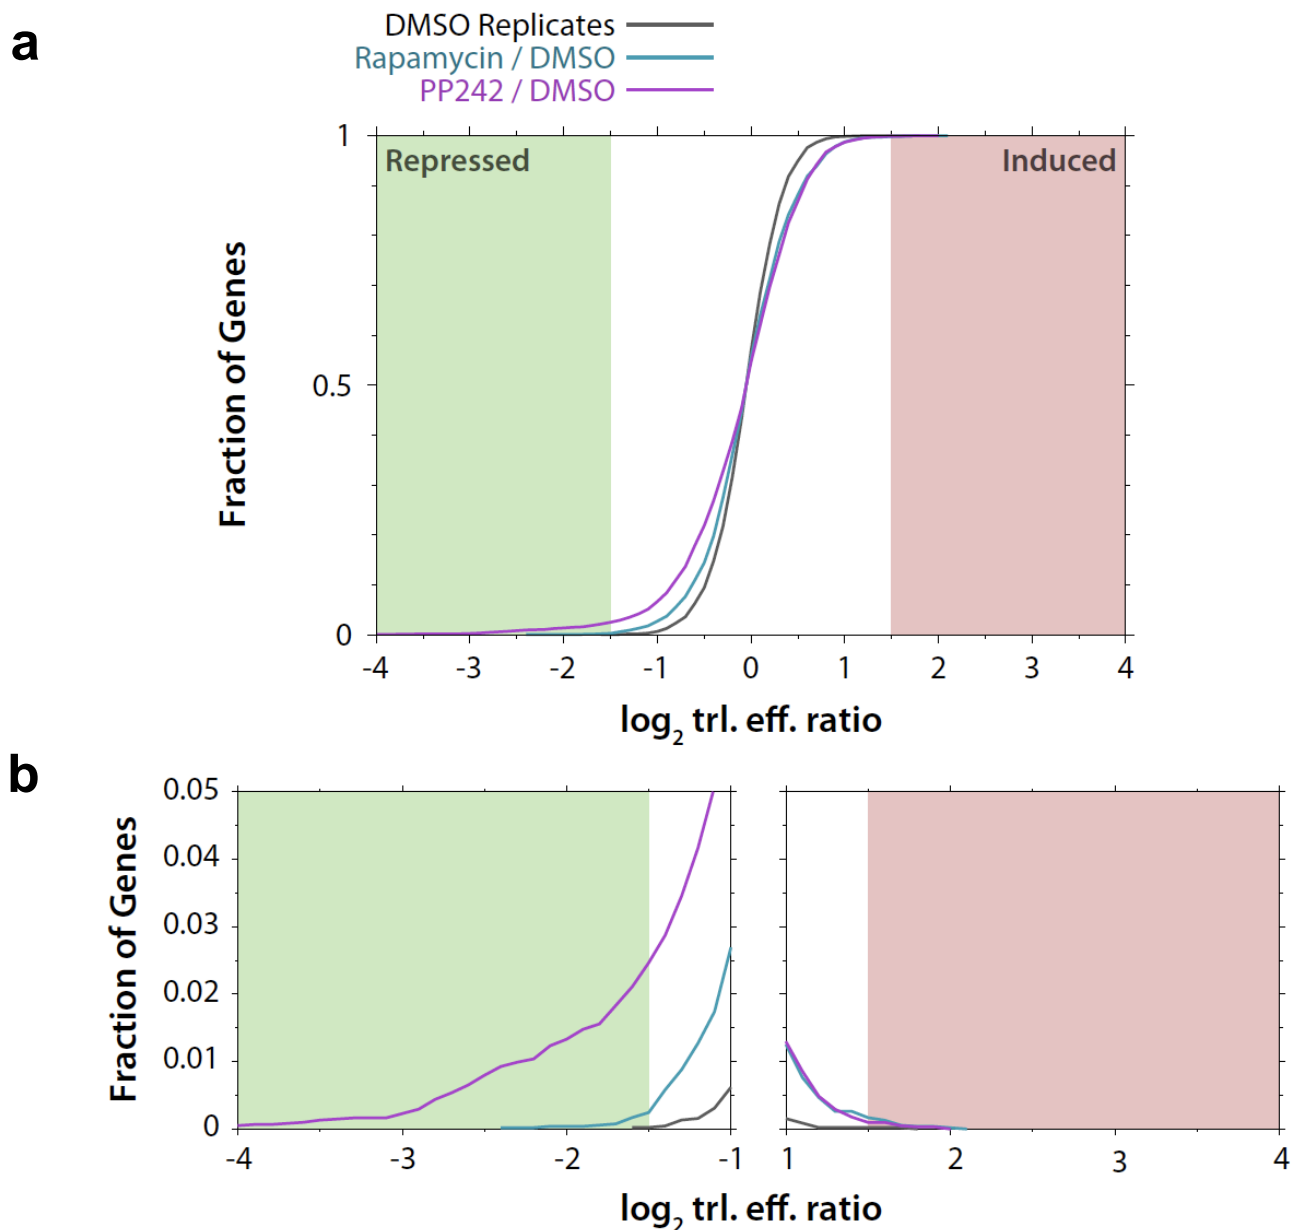

**Supplementary Figure 4. False Discovery Rate computation.** (a) The cumulative distribution of  $\log_2$  fold-change values is shown for three comparisons, considering only genes passing the minimum read count criterion in that comparison. The DMSO replicate represents a comparison of full biological replicates of the control DMSO-only treatment condition. The rapamycin and PP242 conditions show the ratio of drug-treated to DMSO-treated samples within a single experiment. The fold-change threshold chosen based on PP242 translational repression, described below, is shown. (b) The extremes of the  $\log_2$  fold-change cumulative distributions, showing the complementary cumulative distribution function for positive extreme values on the right. We used the cumulative distribution of fold-change values between the DMSO replicates as an estimate to the error distribution for measurements in drug treatment comparisons. That is, the fraction of genes above a given absolute value fold-change level in the comparison of biological replicates should reflect the fraction of genes above that level by chance in any measurement. At a cutoff of  $\log_2$  fold-change of  $\pm 1.5$ , we detect 2.5% (95% CI, 2.1% - 2.9% by Agresti-Coull) of genes in the PP242 / DMSO comparison and only 0.044% (95% CI, 0.001% - 0.172%) of genes in the DMSO replicate comparison. The estimated false discovery rate is therefore  $q = 0.018$  in the PP242 / DMSO comparison at this fold-change threshold.

| Gene              | Description                                        | Rapamycin |        | PP242 |        |
|-------------------|----------------------------------------------------|-----------|--------|-------|--------|
|                   |                                                    | mRNA      | TrIEff | mRNA  | TrIEff |
| 1 <b>EEF2</b>     | eukaryotic translation elongation factor 2         | 0.56      | -1.45  | 0.90  | -4.40  |
| 2 <b>RPS12</b>    | ribosomal protein S12                              | 0.12      | -1.39  | 0.05  | -4.17  |
| 3 <b>RPL12</b>    | ribosomal protein L12                              | -0.01     | -0.74  | 0.17  | -3.99  |
| 4 <b>RPS2</b>     | ribosomal protein S2                               | 0.11      | -0.78  | 0.23  | -3.94  |
| 5 <b>RPL13A</b>   | ribosomal protein L13a                             | 0.20      | -1.38  | 0.35  | -3.75  |
| 6 <b>RPL18A</b>   | ribosomal protein L18a                             | 0.22      | -1.03  | 0.31  | -3.61  |
| 7 <b>EEF1A1</b>   | eukaryotic translation elongation factor 1 alpha 1 | 0.46      | -1.57  | 0.29  | -3.53  |
| 8 <b>RPL28</b>    | ribosomal protein L28 isoform 1                    | 0.64      | -1.59  | 0.55  | -3.48  |
| 9 <b>RPS28</b>    | ribosomal protein S28                              | 0.20      | -1.25  | 0.55  | -3.36  |
| 10 <b>RPS27</b>   | ribosomal protein S27                              | 0.07      | -1.55  | 0.06  | -3.35  |
| 11 <b>RPL34</b>   | ribosomal protein L34                              | 0.11      | -1.27  | -0.04 | -3.05  |
| 12 <b>RPL27A</b>  | ribosomal protein L27a                             | 0.12      | -1.05  | 0.09  | -3.04  |
| 13 <b>RPL10</b>   | ribosomal protein L10                              | 0.13      | -0.79  | 0.36  | -2.99  |
| 14 <b>EEF1D</b>   | eukaryotic translation elongation factor 1 delta   | 0.30      | -1.02  | 0.52  | -2.98  |
| 15 <b>GLTSCR2</b> | glioma tumor suppressor candidate region gene 2    | 0.51      | -1.03  | 1.02  | -2.94  |
| 16 <b>RPL3</b>    | ribosomal protein L3 isoform a                     | 0.28      | -1.29  | 0.28  | -2.89  |
| 17 <b>PABPC1</b>  | poly(A) binding protein, cytoplasmic 1             | 0.52      | -1.47  | 0.14  | -2.88  |
| 18 <b>RPL37A</b>  | ribosomal protein L37a                             | 0.12      | -0.94  | 0.09  | -2.87  |
| 19 <b>RPS5</b>    | ribosomal protein S5                               | 0.23      | -1.06  | 0.30  | -2.86  |
| 20 <b>RPL21</b>   | ribosomal protein L21                              | 0.14      | -1.31  | -0.11 | -2.83  |
| 21 <b>RPS15A</b>  | ribosomal protein S15a                             | 0.03      | -0.98  | 0.04  | -2.81  |
| 22 <b>GNB2L1</b>  | guanine nucleotide binding protein (G protein)     | 0.32      | -1.02  | 0.38  | -2.80  |
| 23 <b>RPL11</b>   | ribosomal protein L11                              | 0.13      | -1.11  | 0.23  | -2.78  |
| 24 <b>RPS20</b>   | ribosomal protein S20 isoform 1                    | 0.14      | -1.79  | -0.10 | -2.78  |
| 25 <b>RPL7A</b>   | ribosomal protein L7a                              | 0.31      | -1.05  | 0.22  | -2.76  |
| 26 <b>RPS19</b>   | ribosomal protein S19                              | 0.28      | -0.76  | 0.34  | -2.76  |
| 27 <b>RPS21</b>   | ribosomal protein S21                              | -0.06     | -0.51  | 0.15  | -2.76  |
| 28 <b>RPLP0</b>   | ribosomal protein P0                               | 0.23      | -0.57  | 0.17  | -2.73  |
| 29 <b>RPS9</b>    | ribosomal protein S9                               | 0.15      | -0.47  | 0.46  | -2.73  |
| 30 <b>RPS3</b>    | ribosomal protein S3                               | 0.35      | -0.93  | 0.33  | -2.72  |
| 31 <b>CRTAP</b>   | cartilage associated protein                       | 0.29      | -1.33  | 0.28  | -2.70  |
| 32 <b>FAM128B</b> | hypothetical protein LOC80097                      | 0.32      | -0.20  | 0.68  | -2.68  |
| 33 <b>RPL32</b>   | ribosomal protein L32                              | 0.32      | -1.20  | 0.12  | -2.67  |
| 34 <b>EEF1G</b>   | eukaryotic translation elongation factor 1, gamma  | 0.31      | -1.17  | 0.10  | -2.65  |
| 35 <b>RPL22L1</b> | ribosomal protein L22-like 1                       | 0.09      | -0.77  | 0.36  | -2.63  |
| 36 <b>YB1</b>     | Y-box binding protein 1                            | 0.11      | -0.72  | 0.30  | -2.62  |
| 37 <b>EIF4B</b>   | eukaryotic translation initiation factor 4B        | 0.71      | -1.36  | 0.58  | -2.61  |
| 38 <b>RPLP2</b>   | ribosomal protein P2                               | 0.46      | -1.44  | 0.31  | -2.61  |
| 39 <b>RPS16</b>   | ribosomal protein S16                              | 0.28      | -0.78  | 0.31  | -2.59  |
| 40 <b>VIM</b>     | vimentin                                           | 0.54      | -0.50  | 0.73  | -2.58  |
| 41 <b>GAMT</b>    | guanidinoacetate N-methyltransferase isoform b     | 0.10      | 0.38   | 0.18  | -2.53  |
| 42 <b>HSPA8</b>   | heat shock 70kDa protein 8 isoform 1               | -0.18     | -0.51  | -0.66 | -2.53  |
| 43 <b>RPL39</b>   | ribosomal protein L39                              | 0.30      | -2.11  | -0.42 | -2.53  |
| 44 <b>AHCY</b>    | adenosylhomocysteinase isoform 1                   | 0.30      | -0.38  | 0.48  | -2.51  |
| 45 <b>EEF1A2</b>  | eukaryotic translation elongation factor 1 alpha 2 | 0.26      | -0.24  | 0.64  | -2.50  |
| 46 <b>RPL10A</b>  | ribosomal protein L10a                             | 0.23      | -1.00  | 0.18  | -2.49  |
| 47 <b>PABPC4</b>  | poly A binding protein, cytoplasmic 4 isoform 1    | 0.40      | -0.81  | 0.51  | -2.48  |
| 48 <b>RPS4X</b>   | ribosomal protein S4, X-linked X isoform           | 0.20      | -1.22  | 0.06  | -2.48  |
| 49 <b>RPL31</b>   | ribosomal protein L31 isoform 2                    | -0.10     | -0.49  | 0.05  | -2.47  |
| 50 <b>RPLP1</b>   | ribosomal protein P1 isoform 1                     | 0.52      | -0.96  | 0.30  | -2.46  |
| 51 <b>RPS11</b>   | ribosomal protein S11                              | 0.20      | -0.74  | 0.33  | -2.46  |
| 52 <b>RPL26</b>   | ribosomal protein L26                              | 0.17      | -1.39  | -0.02 | -2.43  |
| 53 <b>RPL14</b>   | ribosomal protein L14                              | 0.30      | -1.08  | 0.04  | -2.42  |
| 54 <b>RPL37</b>   | ribosomal protein L37                              | 0.11      | -0.64  | 0.14  | -2.39  |
| 55 <b>RPL7</b>    | ribosomal protein L7                               | 0.12      | -1.13  | -0.08 | -2.37  |
| 56 <b>HNRNPA1</b> | heterogeneous nuclear ribonucleoprotein A1         | 0.23      | -0.93  | 0.29  | -2.36  |
| 57 <b>RPS8</b>    | ribosomal protein S8                               | 0.15      | -0.41  | 0.16  | -2.36  |
| 58 <b>GAPDH</b>   | glyceraldehyde-3-phosphate dehydrogenase           | 0.31      | -0.49  | 0.36  | -2.34  |
| 59 <b>RPL8</b>    | ribosomal protein L8                               | 0.29      | -0.59  | 0.49  | -2.31  |
| 60 <b>RPL29</b>   | ribosomal protein L29                              | 0.23      | -0.67  | 0.27  | -2.30  |
| 61 <b>RPS3A</b>   | ribosomal protein S3a                              | 0.29      | -1.21  | -0.17 | -2.29  |
| 62 <b>RPL18</b>   | ribosomal protein L18                              | 0.29      | -0.71  | 0.33  | -2.26  |
| 63 <b>RPL36</b>   | ribosomal protein L36                              | 0.21      | -0.46  | 0.44  | -2.25  |
| 64 <b>AGRN</b>    | agrln precursor                                    | 0.11      | 0.44   | 0.69  | -2.17  |
| 65 <b>TPT1</b>    | tumor protein, translationally-controlled 1        | 0.19      | -1.22  | -0.12 | -2.15  |
| 66 <b>RPL36A</b>  | ribosomal protein L36a                             | 0.13      | -1.18  | -0.01 | -2.13  |
| 67 <b>SLC25A5</b> | adenine nucleotide translocator 2                  | 0.41      | -0.46  | 0.24  | -2.13  |
| 68 <b>TKT</b>     | transketolase isoform 1                            | 0.18      | -0.40  | 0.50  | -2.13  |
| 69 <b>LMF2</b>    | lipase maturation factor 2                         | 0.40      | 0.27   | 0.95  | -2.12  |
| 70 <b>RPL13</b>   | ribosomal protein L13                              | 0.28      | -0.57  | 0.35  | -2.12  |

**Supplementary Figure 5. Representative list of significant translationally regulated PP242 responsive genes.** mRNA expression and translational efficiency changes after 3-hour treatment with rapamycin (50 nM) or PP242 (2.5  $\mu$ M)(FDR <0.05) in PC3 cells ( $\log_2$  fold-change)(Red highlights denote genes with the Pyrimidine Rich Translational Elements (PRTE)).



| Gene | Description | Rapamycin                                         |        | PP242 |        |       |
|------|-------------|---------------------------------------------------|--------|-------|--------|-------|
|      |             | mRNA                                              | TrIEff | mRNA  | TrIEff |       |
| 71   | CTSH        | cathepsin H isoform b                             | -0.09  | 0.17  | 0.17   | -2.10 |
| 72   | FAM83H      | FAM83H                                            | 0.09   | 0.26  | 0.66   | -2.09 |
| 73   | RPS29       | ribosomal protein S29 isoform 2                   | -0.07  | -0.67 | 0.11   | -2.09 |
| 74   | RPL23       | ribosomal protein L23                             | 0.07   | -1.01 | 0.05   | -2.08 |
| 75   | RPS25       | ribosomal protein S25                             | 0.04   | -0.71 | -0.13  | -2.08 |
| 76   | TUBB3       | tubulin, beta, 4                                  | 0.23   | 0.52  | 0.72   | -2.07 |
| 77   | RPS10       | ribosomal protein S10                             | 0.21   | -0.82 | 0.24   | -2.06 |
| 78   | FASN        | fatty acid synthase                               | -0.37  | 0.39  | 0.40   | -2.03 |
| 79   | RPL17       | ribosomal protein L17                             | -0.06  | -0.82 | 0.01   | -2.03 |
| 80   | EIF2S3      | eukaryotic translation initiation factor 2, S3    | 0.41   | -1.27 | 0.09   | -2.02 |
| 81   | RPL30       | ribosomal protein L30                             | 0.06   | -0.97 | -0.07  | -1.97 |
| 82   | ACTG1       | actin, gamma 1 propeptide                         | 0.13   | -0.33 | 0.41   | -1.96 |
| 83   | COL6A2      | alpha 2 type VI collagen isoform 2C2              | 0.00   | 0.43  | 0.86   | -1.95 |
| 84   | UBA52       | ubiquitin and ribosomal protein L40 precursor     | 0.20   | -0.41 | 0.25   | -1.95 |
| 85   | ALKBH7      | spermatogenesis associated 11 precursor           | 0.16   | 0.39  | 0.82   | -1.94 |
| 86   | RPL5        | ribosomal protein L5                              | 0.20   | -1.35 | 0.04   | -1.94 |
| 87   | PGLS        | 6-phosphogluconolactonase                         | 0.23   | -0.24 | 0.64   | -1.92 |
| 88   | CSDA        | cold shock domain protein A                       | 0.29   | -0.70 | 0.38   | -1.91 |
| 89   | RPL6        | ribosomal protein L6                              | 0.04   | -0.74 | 0.02   | -1.90 |
| 90   | RPS24       | ribosomal protein S24 isoform d                   | 0.08   | -1.19 | -0.11  | -1.88 |
| 91   | RPL22       | ribosomal protein L22                             | 0.05   | -0.86 | -0.02  | -1.87 |
| 92   | AP2A1       | adaptor-related protein complex 2, alpha 1        | 0.25   | -0.22 | 0.56   | -1.86 |
| 93   | NAP1L1      | nucleosome assembly protein 1-like 1              | 0.26   | -1.00 | 0.10   | -1.85 |
| 94   | RPS14       | ribosomal protein S14                             | 0.09   | -0.71 | 0.14   | -1.84 |
| 95   | ETHE1       | ETHE1 protein                                     | 0.64   | -0.37 | 0.81   | -1.79 |
| 96   | CCNI        | cyclin I                                          | 0.50   | -0.69 | 0.32   | -1.78 |
| 97   | MTA1        | metastasis associated 1                           | 0.22   | -0.54 | 0.33   | -1.75 |
| 98   | EIF3H       | eukaryotic translation initiation factor 3, H     | 0.21   | -0.97 | 0.00   | -1.74 |
| 99   | RPL9        | ribosomal protein L9                              | 0.09   | -1.01 | -0.23  | -1.74 |
| 100  | RPS23       | ribosomal protein S23                             | 0.18   | -1.36 | -0.08  | -1.74 |
| 101  | RPS6        | ribosomal protein S6                              | 0.13   | -1.09 | -0.10  | -1.74 |
| 102  | RPS7        | ribosomal protein S7                              | 0.05   | -0.89 | -0.13  | -1.74 |
| 103  | RPL19       | ribosomal protein L19                             | 0.21   | -0.71 | 0.18   | -1.73 |
| 104  | RPL4        | ribosomal protein L4                              | 0.29   | -0.97 | 0.04   | -1.73 |
| 105  | RPS13       | ribosomal protein S13                             | 0.07   | -0.83 | -0.22  | -1.73 |
| 106  | C21orf66    | GC-rich sequence DNA-binding factor candidate     | -0.48  | 0.05  | -0.42  | -1.72 |
| 107  | LCMT1       | leucine carboxyl methyltransferase 1 isoform a    | 0.22   | -0.01 | -0.09  | -1.72 |
| 108  | EIF3L       | eukaryotic translation initiation factor 3, L     | 0.36   | -0.93 | 0.22   | -1.70 |
| 109  | IPO7        | importin 7                                        | 0.05   | -0.68 | 0.02   | -1.70 |
| 110  | PC          | pyruvate carboxylase                              | 0.19   | -0.61 | 0.53   | -1.69 |
| 111  | RPS27A      | ubiquitin and ribosomal protein S27a              | 0.13   | -0.81 | -0.15  | -1.69 |
| 112  | SECTM1      | secreted and transmembrane 1 precursor            | 0.06   | 0.50  | 0.67   | -1.69 |
| 113  | RPL41       | ribosomal protein L41                             | 0.01   | -1.48 | -0.13  | -1.68 |
| 114  | TSC2        | tuberous sclerosis 2 isoform 1                    | -0.06  | 0.49  | 0.32   | -1.66 |
| 115  | COL18A1     | alpha 1 type XVIII collagen isoform 3             | -0.10  | 0.24  | 0.52   | -1.65 |
| 116  | CHP         | calcium binding protein P22                       | 0.72   | -1.19 | 0.45   | -1.64 |
| 117  | PACS1       | phosphofurin acidic cluster sorting protein 1     | 0.06   | 0.08  | 0.50   | -1.64 |
| 118  | BRF1        | transcription initiation factor IIIB              | 0.08   | 0.42  | 0.44   | -1.63 |
| 119  | PTGES2      | prostaglandin E synthase 2                        | -0.05  | -0.08 | 0.36   | -1.63 |
| 120  | C2orf79     | hypothetical protein LOC391356                    | 0.16   | -0.41 | 0.02   | -1.62 |
| 121  | PGM1        | phosphoglucomutase 1                              | 0.69   | -0.67 | 0.46   | -1.62 |
| 122  | SLC19A1     | solute carrier family 19 member 1                 | -0.18  | -0.33 | 0.39   | -1.62 |
| 123  | CD44        | CD44 antigen isoform 1                            | 0.60   | -0.77 | 0.59   | -1.59 |
| 124  | RPL24       | ribosomal protein L24                             | 0.12   | -0.53 | -0.09  | -1.59 |
| 125  | NCLN        | nicalin                                           | 0.14   | 0.20  | 0.47   | -1.58 |
| 126  | RPL15       | ribosomal protein L15                             | 0.11   | -0.71 | 0.20   | -1.58 |
| 127  | CLPTM1      | cleft lip and palate associated transmembrane     | 0.04   | -0.12 | 0.50   | -1.56 |
| 128  | ECSIT       | evolutionarily conserved signaling intermediate   | 0.07   | 0.17  | 0.45   | -1.56 |
| 129  | EEF1B2      | eukaryotic translation elongation factor 1 beta 2 | 0.14   | -0.98 | -0.10  | -1.56 |
| 130  | PFDN5       | prefoldin subunit 5 isoform alpha                 | 0.21   | -0.44 | 0.04   | -1.55 |
| 131  | PNKP        | polynucleotide kinase 3' phosphatase              | -0.01  | 0.96  | 0.68   | -1.55 |
| 132  | SEPT8       | septin 8 isoform a                                | 0.12   | 0.59  | 0.10   | -1.55 |
| 133  | CIRBP       | cold inducible RNA binding protein                | 0.30   | 0.09  | 0.86   | -1.54 |
| 134  | ABCB7       | ATP-binding cassette, sub-family B, member 7      | 0.33   | -0.39 | 0.44   | -1.53 |
| 135  | ARD1A       | alpha-N-acetyltransferase 1A                      | 0.15   | -0.14 | 0.12   | -1.53 |
| 136  | EVPL        | envoplakin                                        | 0.03   | 0.36  | 0.72   | -1.53 |
| 137  | LAMA5       | laminin alpha 5                                   | -0.41  | 1.00  | 0.56   | -1.53 |
| 138  | MYH14       | myosin, heavy chain 14 isoform 3                  | 0.28   | 0.07  | 0.83   | -1.53 |
| 139  | RABGGTB     | RAB geranylgeranyltransferase, beta subunit       | -0.40  | -0.88 | 0.07   | -1.53 |
| 140  | RPL27       | ribosomal protein L27                             | 0.09   | -0.49 | -0.19  | -1.53 |
| 141  | RPS15       | ribosomal protein S15                             | 0.15   | 0.10  | 0.44   | -1.53 |
| 142  | IMPDH2      | inosine monophosphate dehydrogenase 2             | 0.20   | -0.61 | 0.20   | -1.52 |
| 143  | SIGMAR1     | sigma non-opioid intracellular receptor 1         | 0.50   | -0.41 | 0.72   | -1.52 |
| 144  | ATP5G2      | ATP synthase, H+ transporting, mitochondrial F0   | 0.50   | -0.68 | 0.33   | -1.51 |
| 145  | C3orf38     | hypothetical protein LOC285237                    | -0.31  | 0.95  | -0.99  | 1.53  |

| Gene | Description | Rapamycin                                          |        | PP242 |        |       |
|------|-------------|----------------------------------------------------|--------|-------|--------|-------|
|      |             | mRNA                                               | TrIEff | mRNA  | TrIEff |       |
| 1    | EEF2        | eukaryotic translation elongation factor 2         | 0.39   | -1.12 | 0.76   | -3.60 |
| 2    | EEF1A1      | eukaryotic translation elongation factor 1 alpha 1 | 0.43   | -1.58 | 0.36   | -3.21 |
| 3    | RPL13A      | ribosomal protein L13a                             | 0.15   | -1.25 | 0.30   | -3.10 |
| 4    | RPS12       | ribosomal protein S12                              | 0.11   | -1.22 | 0.04   | -3.00 |
| 5    | RPL12       | ribosomal protein L12                              | 0.07   | -0.94 | 0.12   | -2.95 |
| 6    | RPS27       | ribosomal protein S27                              | 0.10   | -1.54 | 0.07   | -2.71 |
| 7    | RPS28       | ribosomal protein S28                              | 0.01   | -0.80 | 0.28   | -2.67 |
| 8    | RPL18A      | ribosomal protein L18a                             | 0.17   | -0.82 | 0.23   | -2.63 |
| 9    | RPL34       | ribosomal protein L34                              | 0.11   | -1.12 | 0.04   | -2.63 |
| 10   | RPL28       | ribosomal protein L28 isoform 1                    | 0.24   | -1.09 | 0.22   | -2.54 |
| 11   | RPL27A      | ribosomal protein L27a                             | 0.06   | -0.96 | 0.07   | -2.53 |
| 12   | CRTAP       | cartilage associated protein                       | 0.29   | -1.17 | 0.33   | -2.50 |
| 13   | RPL10       | ribosomal protein L10                              | 0.09   | -0.79 | 0.25   | -2.46 |
| 14   | RPS20       | ribosomal protein S20 isoform 1                    | 0.18   | -1.35 | -0.01  | -2.46 |
| 15   | RPL21       | ribosomal protein L21                              | 0.14   | -1.25 | -0.04  | -2.45 |
| 16   | RPL3        | ribosomal protein L3 isoform a                     | 0.18   | -1.08 | 0.22   | -2.44 |
| 17   | RPL39       | ribosomal protein L39                              | 0.17   | -1.65 | -0.15  | -2.41 |
| 18   | RPL37A      | ribosomal protein L37a                             | 0.08   | -1.02 | 0.01   | -2.38 |
| 19   | VIM         | vimentin                                           | 0.36   | -0.40 | 0.67   | -2.38 |
| 20   | EEF1D       | eukaryotic translation elongation factor 1 delta   | 0.18   | -0.84 | 0.35   | -2.37 |
| 21   | GNB2L1      | guanine nucleotide binding protein (G protein)     | 0.19   | -0.77 | 0.27   | -2.35 |
| 22   | RPS19       | ribosomal protein S19                              | 0.15   | -0.74 | 0.23   | -2.34 |
| 23   | RPL32       | ribosomal protein L32                              | 0.22   | -0.97 | 0.11   | -2.33 |
| 24   | RPS15A      | ribosomal protein S15a                             | 0.07   | -0.96 | 0.07   | -2.31 |
| 25   | RPL11       | ribosomal protein L11                              | 0.09   | -1.08 | 0.14   | -2.31 |
| 26   | RPL7A       | ribosomal protein L7a                              | 0.17   | -0.74 | 0.15   | -2.30 |
| 27   | YB1         | Y-box binding protein 1                            | 0.11   | -0.59 | 0.24   | -2.30 |
| 28   | RPS9        | ribosomal protein S9                               | 0.10   | -0.60 | 0.34   | -2.27 |
| 29   | EIF4B       | eukaryotic translation initiation factor 4B        | 0.55   | -1.21 | 0.61   | -2.27 |
| 30   | EEF1G       | eukaryotic translation elongation factor 1, gamma  | 0.21   | -1.15 | 0.15   | -2.26 |
| 31   | RPS2        | ribosomal protein S2                               | 0.07   | -0.56 | 0.20   | -2.25 |
| 32   | RPS5        | ribosomal protein S5                               | 0.14   | -0.77 | 0.23   | -2.25 |
| 33   | HSPA8       | heat shock 70kDa protein 8 isoform 1               | -0.21  | -0.46 | -0.40  | -2.25 |
| 34   | RPS3A       | ribosomal protein S3a                              | 0.22   | -1.15 | -0.06  | -2.17 |
| 35   | RPS3        | ribosomal protein S3                               | 0.22   | -0.92 | 0.24   | -2.16 |
| 36   | RPL10A      | ribosomal protein L10a                             | 0.16   | -0.94 | 0.14   | -2.16 |
| 37   | RPS25       | ribosomal protein S25                              | 0.04   | -0.89 | -0.04  | -2.13 |
| 38   | GLTSCR2     | glioma tumor suppressor candidate region gene 2    | 0.31   | -0.68 | 0.70   | -2.12 |
| 39   | HNRNPA1     | heterogeneous nuclear ribonucleoprotein A1         | 0.18   | -0.86 | 0.27   | -2.12 |
| 40   | RPLP2       | ribosomal protein P2                               | 0.26   | -1.18 | 0.14   | -2.10 |
| 41   | RPL31       | ribosomal protein L31 isoform 2                    | -0.02  | -0.62 | 0.05   | -2.10 |
| 42   | PABPC1      | poly(A) binding protein, cytoplasmic 1             | 0.35   | -1.44 | 0.16   | -2.09 |
| 43   | RPS21       | ribosomal protein S21                              | -0.01  | -0.60 | 0.09   | -2.09 |
| 44   | RPS4X       | ribosomal protein S4, X-linked X isoform           | 0.18   | -1.15 | 0.12   | -2.06 |
| 45   | RPLP1       | ribosomal protein P1 isoform 1                     | 0.28   | -1.09 | 0.12   | -2.06 |
| 46   | RPL7        | ribosomal protein L7                               | 0.15   | -1.06 | 0.01   | -2.02 |
| 47   | RPL26       | ribosomal protein L26                              | 0.15   | -1.11 | 0.02   | -2.00 |
| 48   | PABPC4      | poly A binding protein, cytoplasmic 4 isoform 1    | 0.24   | -0.80 | 0.40   | -1.98 |
| 49   | RPL36A      | ribosomal protein L36a                             | 0.13   | -1.11 | -0.01  | -1.98 |
| 50   | EEF1A2      | eukaryotic translation elongation factor 1 alpha 2 | 0.03   | -0.03 | 0.40   | -1.94 |
| 51   | TPT1        | tumor protein, translationally-controlled 1        | 0.24   | -1.22 | 0.01   | -1.94 |
| 52   | AHCY        | adenosylhomocysteinase isoform 1                   | 0.20   | -0.23 | 0.38   | -1.93 |
| 53   | RPL22L1     | ribosomal protein L22-like 1                       | 0.15   | -0.68 | 0.39   | -1.90 |
| 54   | GAPDH       | glyceraldehyde-3-phosphate dehydrogenase           | 0.17   | -0.27 | 0.28   | -1.90 |
| 55   | RPL30       | ribosomal protein L30                              | 0.11   | -0.99 | 0.01   | -1.89 |
| 56   | RPS11       | ribosomal protein S11                              | 0.11   | -0.59 | 0.20   | -1.88 |
| 57   | RPL29       | ribosomal protein L29                              | 0.10   | -0.50 | 0.20   | -1.88 |
| 58   | RPL14       | ribosomal protein L14                              | 0.07   | -0.68 | -0.02  | -1.85 |
| 59   | RPL36       | ribosomal protein L36                              | 0.09   | -0.43 | 0.28   | -1.85 |
| 60   | EIF2S3      | eukaryotic translation initiation factor 2, S3     | 0.33   | -1.04 | 0.15   | -1.85 |
| 61   | RPL23       | ribosomal protein L23                              | 0.09   | -0.92 | 0.07   | -1.82 |
| 62   | RPS16       | ribosomal protein S16                              | 0.13   | -0.38 | 0.19   | -1.81 |
| 63   | SLC25A5     | adenine nucleotide translocator 2                  | 0.21   | -0.30 | 0.15   | -1.80 |
| 64   | RPL17       | ribosomal protein L17                              | 0.05   | -0.93 | 0.07   | -1.80 |
| 65   | RPL37       | ribosomal protein L37                              | 0.11   | -0.68 | 0.10   | -1.79 |
| 66   | RPL8        | ribosomal protein L8                               | 0.12   | -0.40 | 0.29   | -1.79 |
| 67   | NAP1L1      | nucleosome assembly protein 1-like 1               | 0.24   | -0.97 | 0.15   | -1.79 |
| 68   | RPS10       | ribosomal protein S10                              | 0.16   | -0.69 | 0.19   | -1.78 |
| 69   | IPO7        | importin 7                                         | 0.20   | -0.83 | 0.26   | -1.75 |
| 70   | RPS8        | ribosomal protein S8                               | 0.09   | -0.44 | 0.14   | -1.74 |
| 71   | RPL5        | ribosomal protein L5                               | 0.17   | -1.11 | 0.06   | -1.73 |
| 72   | RPS24       | ribosomal protein S24 isoform d                    | 0.11   | -1.16 | -0.01  | -1.73 |

**Supplementary Figure 6. Mean list of translationally regulated PP242 responsive genes.** mRNA expression and translational efficiency changes after 3-hour treatment with rapamycin (50 nM) or PP242 (2.5  $\mu$ M) in PC3 cells ( $\log_2$  fold-change) (data represents the average of 2 independent experiments).

| Gene | Description | Rapamycin                                         |        | PP242 |        |       |
|------|-------------|---------------------------------------------------|--------|-------|--------|-------|
|      |             | mRNA                                              | TrIEff | mRNA  | TrIEff |       |
| 73   | EEF1B2      | eukaryotic translation elongation factor 1 beta 2 | 0.12   | -1.10 | -0.06  | -1.70 |
| 74   | RPL6        | ribosomal protein L6                              | 0.09   | -0.68 | 0.06   | -1.68 |
| 75   | RPS23       | ribosomal protein S23                             | 0.15   | -1.19 | -0.03  | -1.68 |
| 76   | RPL18       | ribosomal protein L18                             | 0.08   | -0.42 | 0.18   | -1.65 |
| 77   | RPS29       | ribosomal protein S29 isoform 2                   | -0.01  | -0.69 | 0.11   | -1.65 |
| 78   | RPS6        | ribosomal protein S6                              | 0.14   | -1.06 | -0.02  | -1.65 |
| 79   | RPL22       | ribosomal protein L22                             | 0.08   | -0.89 | 0.00   | -1.64 |
| 80   | UBA52       | ubiquitin and ribosomal protein L40               | 0.12   | -0.22 | 0.18   | -1.62 |
| 81   | RPLP0       | ribosomal protein P0                              | 0.15   | -0.42 | 0.12   | -1.61 |
| 82   | RPS27A      | ubiquitin and ribosomal protein S27a              | 0.16   | -0.89 | -0.04  | -1.61 |
| 83   | RPL9        | ribosomal protein L9                              | 0.16   | -1.00 | -0.08  | -1.59 |
| 84   | TKT         | transketolase isoform 1                           | 0.02   | -0.11 | 0.33   | -1.58 |
| 85   | RPL13       | ribosomal protein L13                             | 0.14   | -0.38 | 0.26   | -1.56 |
| 86   | EIF3H       | eukaryotic translation initiation factor 3,       | 0.16   | -0.79 | 0.09   | -1.54 |
| 87   | RPS13       | ribosomal protein S13                             | 0.07   | -0.82 | -0.08  | -1.54 |
| 88   | RPS7        | ribosomal protein S7                              | 0.11   | -0.76 | -0.04  | -1.51 |
| 89   | RPS14       | ribosomal protein S14                             | 0.10   | -0.60 | 0.16   | -1.50 |
| 90   | RPL4        | ribosomal protein L4                              | 0.22   | -0.85 | 0.10   | -1.50 |
| 91   | FAM128B     | hypothetical protein LOC80097                     | 0.06   | 0.27  | 0.43   | -1.47 |
| 92   | EIF3L       | eukaryotic translation initiation factor 3L       | 0.28   | -0.85 | 0.21   | -1.47 |
| 93   | RABGGTB     | RAB geranylgeranyltransferase, beta subunit       | -0.20  | -0.84 | 0.20   | -1.46 |
| 94   | FASN        | fatty acid synthase                               | -0.37  | 0.47  | 0.30   | -1.42 |
| 95   | RPL24       | ribosomal protein L24                             | 0.11   | -0.63 | 0.00   | -1.41 |
| 96   | ACTG1       | actin, gamma 1 propeptide                         | 0.02   | -0.07 | 0.28   | -1.40 |
| 97   | PFDN5       | prefoldin subunit 5 isoform alpha                 | 0.11   | -0.51 | 0.04   | -1.38 |
| 98   | LMF2        | lipase maturation factor 2                        | 0.22   | 0.39  | 0.62   | -1.36 |
| 99   | RPL19       | ribosomal protein L19                             | 0.14   | -0.66 | 0.11   | -1.35 |
| 100  | PGM1        | phosphoglucomutase 1                              | 0.40   | -0.55 | 0.23   | -1.35 |
| 101  | CCNI        | cyclin I                                          | 0.29   | -0.45 | 0.24   | -1.33 |
| 102  | IMPDH2      | inosine monophosphate dehydrogenase 2             | 0.11   | -0.39 | 0.21   | -1.33 |
| 103  | AP2A1       | adaptor-related protein complex 2, alpha 1        | 0.09   | -0.04 | 0.42   | -1.32 |
| 104  | AGRN        | agrin precursor                                   | 0.01   | 0.51  | 0.50   | -1.29 |
| 105  | COL6A2      | alpha 2 type VI collagen isoform 2C2              | -0.08  | 0.43  | 0.57   | -1.29 |
| 106  | CD44        | CD44 antigen isoform 1                            | 0.34   | -0.46 | 0.43   | -1.29 |
| 107  | RPL41       | ribosomal protein L41                             | 0.04   | -1.15 | -0.01  | -1.28 |
| 108  | ALKBH7      | spermatogenesis associated 11 precursor           | 0.06   | 0.28  | 0.51   | -1.27 |
| 109  | RPL27       | ribosomal protein L27                             | 0.05   | -0.33 | -0.13  | -1.23 |
| 110  | RPL15       | ribosomal protein L15                             | 0.11   | -0.51 | 0.19   | -1.20 |
| 111  | RPS15       | ribosomal protein S15                             | -0.01  | 0.03  | 0.21   | -1.19 |
| 112  | CLPTM1      | cleft lip and palate associated transmembrane     | 0.07   | 0.26  | 0.41   | -1.13 |
| 113  | FAM83H      | FAM83H                                            | -0.17  | 0.71  | 0.33   | -1.11 |
| 114  | PGLS        | 6-phosphogluconolactonase                         | 0.03   | 0.20  | 0.21   | -1.11 |
| 115  | MTA1        | metastasis associated 1                           | 0.00   | -0.05 | 0.21   | -1.09 |
| 116  | TSC2        | tuberous sclerosis 2 isoform 1                    | -0.15  | 0.34  | 0.21   | -1.09 |
| 117  | PACS1       | phosphofurin acidic cluster sorting protein 1     | 0.07   | 0.04  | 0.45   | -1.09 |
| 118  | CIRBP       | cold inducible RNA binding protein                | 0.14   | 0.10  | 0.54   | -1.08 |
| 119  | SLC19A1     | solute carrier family 19 member 1                 | -0.36  | 0.23  | 0.10   | -1.07 |
| 120  | ECSIT       | evolutionarily conserved signaling intermediate   | -0.04  | 0.41  | 0.26   | -1.06 |
| 121  | ARD1A       | alpha-N-acetyltransferase 1A                      | -0.04  | 0.01  | 0.03   | -1.05 |
| 122  | C21orf66    | GC-rich sequence DNA-binding factor candidate     | -0.30  | -0.09 | -0.31  | -1.03 |
| 123  | ATP5G2      | ATP synthase, H+ transporting, mitochondrial F0   | 0.29   | -0.28 | 0.17   | -1.01 |
| 124  | LAMA5       | laminin alpha 5                                   | -0.32  | 0.87  | 0.40   | -0.94 |
| 125  | PNKP        | polynucleotide kinase 3' phosphatase              | -0.24  | 0.74  | 0.33   | -0.79 |
| 126  | EVPL        | envoplakin                                        | -0.08  | 0.30  | 0.38   | -0.79 |
| 127  | NCLN        | nicalin                                           | -0.05  | 0.67  | 0.29   | -0.76 |
| 128  | PTGES2      | prostaglandin E synthase 2                        | -0.19  | 0.52  | 0.17   | -0.65 |
| 129  | GAMT        | guanidinoacetate N-methyltransferase isoform b    | n/a    | n/a   | n/a    | n/a   |
| 130  | CTSH        | cathepsin H isoform b                             | n/a    | n/a   | n/a    | n/a   |
| 131  | TUBB3       | tubulin, beta, 4                                  | n/a    | n/a   | n/a    | n/a   |
| 132  | CSDA        | cold shock domain protein A                       | n/a    | n/a   | n/a    | n/a   |
| 133  | ETHE1       | ETHE1 protein                                     | n/a    | n/a   | n/a    | n/a   |
| 134  | LCMT1       | leucine carboxyl methyltransferase 1 isoform a    | n/a    | n/a   | n/a    | n/a   |
| 135  | PC          | pyruvate carboxylase                              | n/a    | n/a   | n/a    | n/a   |
| 136  | SECTM1      | secreted and transmembrane 1                      | n/a    | n/a   | n/a    | n/a   |
| 137  | COL18A1     | alpha 1 type XVIII collagen isoform 3             | n/a    | n/a   | n/a    | n/a   |
| 138  | CHP         | calcium binding protein P22                       | n/a    | n/a   | n/a    | n/a   |
| 139  | BRF1        | transcription initiation factor IIIB              | n/a    | n/a   | n/a    | n/a   |
| 140  | C2orf79     | hypothetical protein LOC391356                    | n/a    | n/a   | n/a    | n/a   |
| 141  | SEPT8       | septin 8 isoform a                                | n/a    | n/a   | n/a    | n/a   |
| 142  | ABCB7       | ATP-binding cassette, sub-family B, member 7      | n/a    | n/a   | n/a    | n/a   |
| 143  | MYH14       | myosin, heavy chain 14 isoform 3                  | n/a    | n/a   | n/a    | n/a   |
| 144  | SIGMAR1     | sigma non-opioid intracellular receptor 1         | n/a    | n/a   | n/a    | n/a   |
| 145  | C3orf38     | hypothetical protein LOC285237                    | n/a    | n/a   | n/a    | n/a   |



|    | Gene    | RefSeq ID           | Chromosome | Strand (+/-) | 5' TOP Position     | PRTE Position       |
|----|---------|---------------------|------------|--------------|---------------------|---------------------|
| 1  | AP2A1   | NM_014203           | 19         | +            | 50270268            | 50270306            |
| 2  | CCNI    | NM_006835           | 4          | -            | 77997142            | 77997076            |
| 3  | CD44    | NM_000610           | 11         | +            | 35160717            | 35160813            |
| 4  | CHP     | NM_007236           | 15         | +            | 41523519            | 41523536            |
| 5  | CRTAP   | NM_006371           | 3          | +            | 33155506/33155554   | 33155540            |
| 6  | eEF1A2  | NM_001958           | 20         | -            | 62130436            | 62129175            |
| 7  | eEF1B2  | NM_021121           | 2          | +            | 207024619           | 207024665           |
| 8  | eEF1G   | NM_001404           | 11         | -            | 62341490/62341335   | 62341383            |
| 9  | eEF2    | NM_001961           | 19         | -            | 3985461             | 3985423             |
| 10 | eIF4B   | NM_001417           | 12         | +            | 53400240            | 53400250            |
| 11 | GAPDH   | NM_002046           | 12         | +            | 6643684             | 6643717             |
| 12 | GNB2L1  | NM_006098           | 5          | -            | 180670906           | 180670818           |
| 13 | HNRNPA1 | NM_031157           | 12         | +            | 54674529            | 54674571            |
| 14 | HSPA8   | NM_006597           | 11         | -            | 122932844           | 122932806           |
| 15 | IPO7    | NM_006391           | 11         | +            | 9406199             | 9406255             |
| 16 | LCMT1   | NM_016309           | 16         | +            | 25123101            | 25123114            |
| 17 | NAP1L1  | NM_004537           | 12         | -            | 76478465            | 76478429            |
| 18 | PABPC1  | NM_002568           | 8          | -            | 101734315           | 101734151           |
| 19 | PACS1   | NM_018026           | 11         | +            | 65837839            | 65837922            |
| 20 | PGM1    | NM_002633           | 1          | +            | 64059078            | 64059107            |
| 21 | RABGGTB | NM_004582           | 1          | +            | 76251941            | 76251928            |
| 22 | RPL10   | NM_006013           | X          | +            | 153626718           | 153626846           |
| 23 | RPL12   | NM_000976           | 9          | -            | 130213677           | 130213648           |
| 24 | RPL13   | NM_000977/NM_033251 | 16         | +            | 89627090            | 89627102/89627202   |
| 25 | RPL14   | NM_001034996        | 3          | +            | 40498830            | 40498906            |
| 26 | RPL15   | NM_002948           | 3          | +            | 23958639            | 23958711            |
| 27 | RPL17   | NM_000985           | 18         | -            | 47018849            | 47017964            |
| 28 | RPL22   | NM_000983           | 1          | -            | 6259654             | 6259645             |
| 29 | RPL22L1 | NM_001099645        | 3          | -            | 170587984           | 170587976           |
| 30 | RPL23   | NM_000978           | 17         | -            | 37009989            | 37010013            |
| 31 | RPL29   | NM_000992           | 3          | -            | 52029911            | 52029904            |
| 32 | RPL31   | NM_001098577        | 2          | +            | 101618755           | 101618739           |
| 33 | RPL32   | NM_001007074        | 3          | -            | 12883040            | 12883002            |
| 34 | RPL34   | NM_000995/NM_033625 | 4          | +            | 109541733           | 109541743/109541769 |
| 35 | RPL36   | NM_033643/NM_015414 | 19         | +            | 5690307             | 5690319/5690493     |
| 36 | RPL36A  | NM_021029           | X          | +            | 100645999           | 100645981           |
| 37 | RPL37   | NM_000997           | 5          | -            | 40835324            | 40835314            |
| 38 | RPL37A  | NM_000998           | 2          | +            | 217363567           | 217363526           |
| 39 | RPL39   | NM_001000           | X          | -            | 118925591           | 118925564           |
| 40 | RPL4    | NM_000968           | 15         | -            | 66797185            | 66797143            |
| 41 | RPL41   | NM_001035267        | 12         | +            | 56510417            | 56510539            |
| 42 | RPL5    | NM_000969           | 1          | +            | 93297597            | 93297656            |
| 43 | RPL6    | NM_000970           | 12         | -            | 112847409           | 112847256           |
| 44 | RPL8    | NM_000973/NM_033301 | 8          | -            | 146017775           | 146017709           |
| 45 | RPLP0   | NM_053275           | 12         | -            | 120638910           | 120638652           |
| 46 | RPLP2   | NM_001004           | 11         | +            | 809968              | 810006              |
| 47 | RPS10   | NM_001014           | 6          | -            | 34393846            | 34393715            |
| 48 | RPS11   | NM_001015           | 19         | +            | 49999690            | 49999677            |
| 49 | RPS14   | NM_001025070        | 5          | -            | 149829300/149829186 | 149829107           |
| 50 | RPS15A  | NM_001030009        | 16         | -            | 18801656            | 18801604            |
| 51 | RPS2    | NM_002952           | 16         | -            | 2014827             | 2014653             |

**Supplementary Figure 7. 5'TOP and PRTE genomic positions in 61 mTOR sensitive genes that possess both motifs based on DBTSS release 8.0 (slashes demarcate 5'TOPs or PRTEs in putative mRNA isoforms).**

|    |        |              |    |   |           |                   |
|----|--------|--------------|----|---|-----------|-------------------|
| 52 | RPS20  | NM_001146227 | 8  | - | 56987065  | 56986992          |
| 53 | RPS27A | NM_001177413 | 2  | + | 55459824  | 55459920          |
| 54 | RPS3A  | NM_001006    | 4  | + | 152020780 | 152020789         |
| 55 | RPS5   | NM_001009    | 19 | + | 58898636  | 58898691          |
| 56 | RPS6   | NM_001010    | 9  | - | 19380234  | 19380207          |
| 57 | RPS9   | NM_001013    | 19 | + | 54704726  | 54704775          |
| 58 | SECTM1 | NM_003004    | 17 | - | 80291646  | 80291674/80291639 |
| 59 | TPT1   | NM_003295    | 13 | - | 45915318  | 45915222          |
| 60 | UBA52  | NM_003333    | 19 | + | 18682670  | 18683218          |
| 61 | VIM    | NM_003380    | 10 | + | 17271277  | 17271358          |

| Gene               | Description                                      | Rapamycin |        | PP242 |        |
|--------------------|--------------------------------------------------|-----------|--------|-------|--------|
|                    |                                                  | mRNA      | TrIEff | mRNA  | TrIEff |
| <b>1</b> MAPK6     | mitogen-activated protein kinase 6               | 0.13      | -2.43  | 0.10  | -0.29  |
| <b>2</b> RPL39 *   | ribosomal protein L39                            | 0.30      | -2.11  | -0.42 | -2.53  |
| <b>3</b> RPS20 *   | ribosomal protein S20 isoform 1                  | 0.14      | -1.79  | -0.10 | -2.78  |
| <b>4</b> PRKD3     | protein kinase D3                                | -0.22     | -1.72  | -0.46 | 0.68   |
| <b>5</b> UBTD2     | dendritic cell-derived ubiquitin-like protein    | 0.19      | -1.64  | 0.25  | 0.27   |
| <b>6</b> RPL28 *   | ribosomal protein L28 isoform 1                  | 0.64      | -1.59  | 0.55  | -3.48  |
| <b>7</b> RBPJ      | recombining binding protein suppressor of        | 1.09      | -1.58  | 0.17  | -0.03  |
| <b>8</b> EEF1A1 *  | eukaryotic translation elongation factor 1 alpha | 0.46      | -1.57  | 0.29  | -3.53  |
| <b>9</b> UCHL5     | ubiquitin carboxyl-terminal hydrolase L5         | -0.08     | -1.56  | -0.51 | 0.40   |
| <b>10</b> RPS27 *  | ribosomal protein S27                            | 0.07      | -1.55  | 0.06  | -3.35  |
| <b>11</b> SDCCAG10 | serologically defined colon cancer antigen 10    | -0.19     | -1.50  | -0.37 | 0.23   |
| <b>12</b> MAPKAPK2 | mitogen-activated protein kinase-activated       | -0.21     | 1.50   | -0.22 | 0.92   |
| <b>13</b> NFATC2IP | nuclear factor of activated T-cells, 2IP         | -0.16     | 1.54   | 0.08  | 0.35   |
| <b>14</b> GTPBP3   | GTP binding protein 3 (mitochondrial) isoform V  | -0.73     | 1.56   | 0.15  | -0.83  |
| <b>15</b> C17orf28 | hypothetical protein LOC283987                   | -0.44     | 1.66   | 0.21  | -0.20  |
| <b>16</b> VHL      | von Hippel-Lindau tumor suppressor isoform 1     | -0.23     | 1.67   | 0.43  | 0.52   |
| <b>17</b> DDX51    | DEAD (Asp-Glu-Ala-Asp) box polypeptide 51        | -0.24     | 1.68   | 0.17  | -0.51  |
| <b>18</b> DGCR2    | integral membrane protein DGCR2                  | -0.66     | 1.69   | 0.05  | 0.02   |
| <b>19</b> CCNA1    | cyclin A1 isoform a                              | -0.51     | 1.81   | -0.33 | 0.66   |
| <b>20</b> NR2F1    | nuclear receptor subfamily 2, group F, member 1  | 0.05      | 1.94   | 0.87  | -0.09  |
| <b>21</b> ACD      | adrenocortical dysplasia homolog isoform 1       | -0.96     | 2.06   | 0.20  | -1.02  |

**Supplementary Figure 8. List of rapamycin sensitive translationally regulated genes after 3-hour treatment with rapamycin (50 nM) or PP242 (2.5  $\mu$ M) in PC3 cells (\* = targets which overlap with PP242, log<sub>2</sub> fold-change).**

**a**

|           | <b>Gene</b> | <b>Description</b>                              | <b>mRNA</b> |
|-----------|-------------|-------------------------------------------------|-------------|
| <b>1</b>  | FGFBP1      | fibroblast growth factor binding protein 1      | -1.75       |
| <b>2</b>  | BRIX1       | ribosome biogenesis protein BRX1 homolog        | -1.51       |
| <b>3</b>  | FOXA1       | forkhead box A1                                 | 1.45        |
| <b>4</b>  | CYR61       | cysteine-rich, angiogenic inducer, 61 precursor | 1.47        |
| <b>5</b>  | MT2A        | metallothionein 2A                              | 1.47        |
| <b>6</b>  | SOX4        | SRY (sex determining region Y)-box 4            | 1.51        |
| <b>7</b>  | BCL6        | B-cell lymphoma 6 protein isoform 1             | 1.59        |
| <b>8</b>  | KLF6        | Kruppel-like factor 6 isoform A                 | 1.75        |
| <b>9</b>  | RND3        | ras homolog gene family, member E precursor     | 1.78        |
| <b>10</b> | CTGF        | connective tissue growth factor precursor       | 1.80        |
| <b>11</b> | HBP1 *      | HMG-box transcription factor 1                  | 1.88        |
| <b>12</b> | ARID5B      | AT rich interactive domain 5B (MRF1-like)       | 1.93        |
| <b>13</b> | PLAU        | plasminogen activator, urokinase isoform 1      | 2.04        |
| <b>14</b> | GDF15       | growth differentiation factor 15                | 3.02        |

**b**

|          | <b>Gene</b> | <b>Description</b>             | <b>mRNA</b> |
|----------|-------------|--------------------------------|-------------|
| <b>1</b> | HBP1        | HMG-box transcription factor 1 | 1.75        |

**Supplementary Table 9. PP242 and rapamycin transcriptional targets.** (a) List of PP242 sensitive transcriptionally regulated genes upon 3-hour treatment with PP242 (2.5  $\mu$ M) in PC3 cells (\* = target which overlaps with rapamycin)(log<sub>2</sub> fold-change). (b) Rapamycin sensitive transcriptionally regulated genes upon 3-hour treatment with rapamycin (50 nM) in PC3 cells (log<sub>2</sub> fold-change).



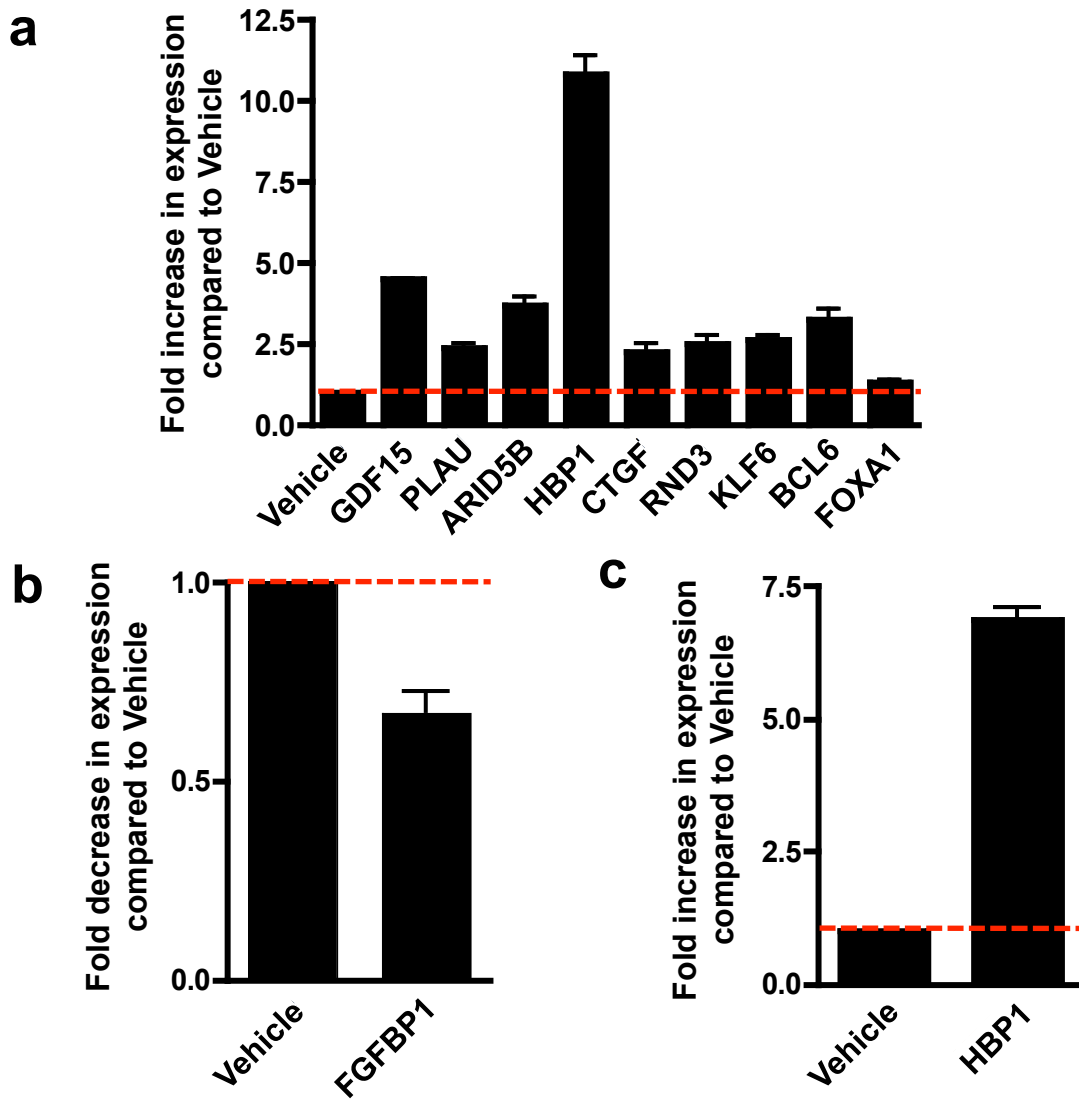

**Supplementary Figure 10. Transcriptionally regulated mTOR targets.** (a and b) qPCR validation of up-regulated or down-regulated transcripts identified by RNA-Seq upon 3-hour PP242 treatment (2.5  $\mu$ M) in PC3 cells (mean  $\pm$  SEM, n = 3). (c) qPCR validation of up-regulated transcript identified by RNA-Seq upon 3-hour rapamycin treatment (50 nM) in PC3 cells (mean  $\pm$  SEM, n = 3).

**a**

|                             | Gene           | Description                                     |
|-----------------------------|----------------|-------------------------------------------------|
| Known pro-invasion genes    | <b>YB1</b>     | Y-box binding protein 1                         |
|                             | <b>VIM</b>     | vimentin                                        |
|                             | <b>MTA1</b>    | metastasis associated 1                         |
|                             | <b>CD44</b>    | CD44                                            |
| Putative pro-invasion genes | <b>ACTG1</b>   | actin G1                                        |
|                             | <b>TUBB3</b>   | tubulin, beta, 4                                |
|                             | <b>COL6A2</b>  | alpha 2 type VI collagen isoform 2C2            |
|                             | <b>COL18A1</b> | alpha 1 type XVIII collagen isoform 3 precursor |
|                             | <b>SEPT8</b>   | septin 8 isoform a                              |
|                             | <b>LAMA5</b>   | laminin alpha 5                                 |
|                             | <b>MYH14</b>   | myosin, heavy chain 14 isoform 3                |

**b**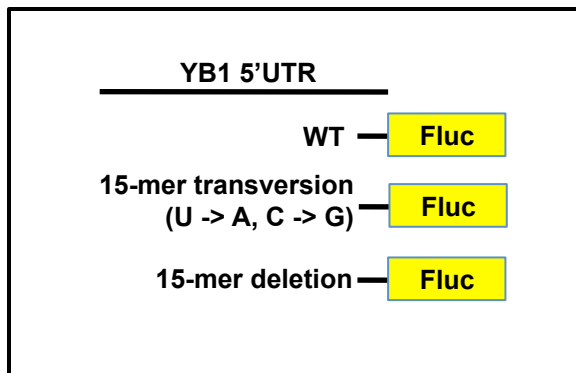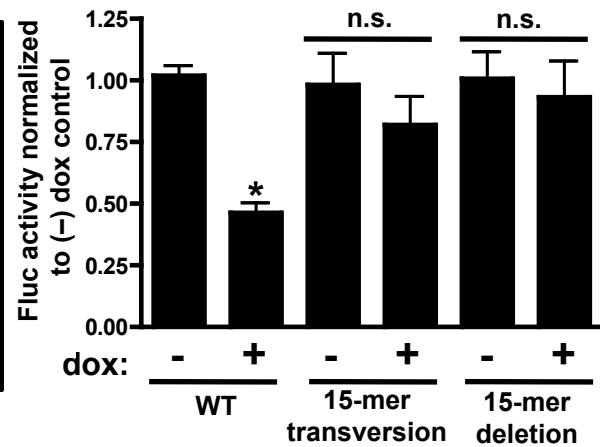

**Supplementary Figure 11. mTOR sensitive translationally regulated gene invasion signature. Mutation of the Pyrimidine Rich Translational Element abrogates sensitivity to eIF4E.** (a) 4 known pro-invasion genes and 7 putative pro-invasion genes discovered through ribosome profiling. (b) Schematic of *YB1* 5'UTR cloning (WT, transversion mutant, and deletion mutant of the PRTE (position +20-34, uc001chs.2)) into pGL3-Promoter (Left panel). Firefly luciferase activity in PC3-4EBP1<sup>M</sup> cells after a 24-hour pre-treatment with 1µg/ml doxycycline followed by transfection of respective 5'UTR constructs (mean ± SEM, n = 7, \* P<0.0001, t-test)(Right panel). n.s. – not statistically significant.

**a**

| Profile                                                                                                                         | INK128                         |
|---------------------------------------------------------------------------------------------------------------------------------|--------------------------------|
| Molecular weight (Da):                                                                                                          | 309                            |
| mTOR biochemical IC <sub>50</sub> (nM):                                                                                         | 1.0                            |
| Class I PI3K biochemical IC <sub>50</sub> (nM):<br>PI3K $\alpha$<br>PI3K $\beta$<br>PI3K $\delta$<br>PI3K $\gamma$              | 219<br>5293<br>230<br>221      |
| Cellular potency (PC3 cell, EC <sub>50</sub> nM):<br>- Inhibition of proliferation<br>- Inhibition of pathway (pS6/pAkt)        | 17<br><10                      |
| Plasma protein binding (%): (m/r/d/mk/h)                                                                                        | 48 / 65 / 47 / 62 / 71         |
| Pharmacokinetics (mouse; 1.0 mg/kg; p.o.): C <sub>max</sub><br>T <sub>max</sub> (hr)/T <sub>1/2</sub> (hr):<br>Bioavailability: | 500nM<br>0.25 - 0.5/1.5<br>90% |
| In vivo potency (tumor growth inhibition): (ED <sub>90</sub><br>mg/kg; po, qd)                                                  | 1.0                            |

**b**

| Enzyme        | K <sub>i</sub> (nM) |
|---------------|---------------------|
| mTOR          | 1.4                 |
| PI3K $\alpha$ | 152                 |
| PI3K $\beta$  | 4700                |
| PI3K $\gamma$ | 165                 |

|      | K <sub>d</sub> ( $\mu$ M) | k <sub>on</sub> (1/s *1/ $\mu$ M) | k <sub>off</sub> (1/s) |
|------|---------------------------|-----------------------------------|------------------------|
| mTOR | 0.0003                    | 18.4                              | 0.0053                 |

**c**

| Lipid-PIKK selectivity                             | (% inhibition at 1000nM, 100nM): |
|----------------------------------------------------|----------------------------------|
| PI3K Class II<br>PI3KC2 $\alpha$<br>PI3KC2 $\beta$ | (85, 44)<br>(21, 9)              |
| PI3K Class III<br>VPS34                            | (0, 0)                           |
| PI4K<br>PI4K $\alpha$<br>PI4K $\beta$              | (0, 0)<br>(0, 0)                 |
| PIKK<br>DNA-PK (IC <sub>50</sub> nM)*              | 10                               |

\* INK128 inhibits DNA-PK activity in the cell only at high concentration (1 mM) while it inhibits mTOR activity in the cell at less than 10 nM

**Supplementary Figure 12. Preclinical properties of INK128** (a) INK128 displayed a maximal oral tumor growth inhibition of ED<sub>90</sub> at 1.0 mg/kg in xenograft solid tumor mouse models due to its biochemical, cellular potency and favorable pharmacokinetic properties. In detail, the percentage of protein binding of INK128 was determined in mouse, rat, dog, monkey, and human plasma at CEREP. Mouse pharmacokinetic parameters were assessed after acute dosing with INK128 at 0.3, 1.0, and 3.0 mg/kg by oral gavage resulting in plasma C<sub>max</sub> values of 200, 600, and 1940 nM and AUC<sub>last</sub> values of 500, 1300, and 2560 hr•ng/mL, respectively. INK128 displayed consistent and predictable oral pharmacokinetic parameters such as dose-linear plasma exposures across mouse, but also rat and cynomolgus monkey, with rapid absorption (T<sub>max</sub> ranged from 0.25 hr to 5.0 hrs) and high oral bioavailability (%F ranging from 70% to 98%) supporting once-daily administration. In mouse tumor models, pharmacokinetic analysis displayed a dose-dependent increase in INK128 levels in plasma and tumor. Tumor concentrations appeared to be slightly higher than plasma concentrations. INK128 was well tolerated at efficacious doses in *in vivo* pharmacology studies. (b) INK128 was screened in biochemical assays with mTOR, PI3K $\alpha$ , PI3K $\beta$  and PI3K $\gamma$  to determine the K<sub>i</sub> for each target. The average K<sub>i</sub> values were determined using the Cheng-Pursoff equation. K<sub>d</sub>, K<sub>on</sub>, and K<sub>off</sub> values were determined using the Proteros Reporter Displacement Assay. (c) Lipid kinase selectivity of INK128. The values indicate percent inhibition at 1 mM and 100 nM of INK128.

| Kinase Tested         | % Inhibition |                          |     |                     |     |                      |     |                         |     |
|-----------------------|--------------|--------------------------|-----|---------------------|-----|----------------------|-----|-------------------------|-----|
| ABL1                  | 48           | CSNK1G2 (CK1 gamma 2)    | 4   | HCK                 | 41  | MERTK (cMER)         | 16  | PRKG2 (PKG2)            | 4   |
| AKT1 (PKB alpha)      | 0            | CSNK1G3 (CK1 gamma 3)    | 12  | HIPK1 (Myak)        | 1   | MET M1250T           | 3   | PRKX                    | 0   |
| ALK                   | 18           | CSNK2A1 (CK2 alpha 1)    | 1   | HIPK4               | 7   | MINK1                | 4   | PTK2 (FAK)              | 12  |
| AURKA (Aurora A)      | 13           | CSNK2A2 (CK2 alpha 2)    | 4   | IGF1R               | 3   | MST1R (RON)          | 1   | PTK2B (FAK2)            | 5   |
| ABL1 E255K            | 45           | DAPK1                    | 13  | IKBKB (IKK beta)    | 1   | MST4                 | -5  | PTK6 (Brk)              | 53  |
| ABL1 G250E            | 27           | DAPK3 (ZIPK)             | -1  | IKBKE (IKK epsilon) | 1   | MUSK                 | 15  | RAF1 (cRAF) Y340D Y341D | 34  |
| ABL1 T315I            | 9            | DCAMKL2 (DCK2)           | 2   | INSR                | 4   | MYLK2 (skMLCK)       | 15  | RET                     | 51  |
| ABL1 Y253F            | 62           | DYRK1A                   | -1  | INSRR (IRR)         | 14  | NEK1                 | 7   | RET V804L               | 8   |
| ABL2 (Arg)            | 39           | DYRK1B                   | 3   | IRAK4               | 5   | NEK2                 | 1   | RET Y791F               | 71  |
| ACVR1B (ALK4)         | 25           | DYRK3                    | 31  | ITK                 | 0   | NEK4                 | 2   | ROCK1                   | 0   |
| ADRBK1 (GRK2)         | 3            | DYRK4                    | -4  | JAK1                | 4   | NEK6                 | -2  | ROCK2                   | 1   |
| ADRBK2 (GRK3)         | -4           | EEF2K                    | 6   | JAK2                | -2  | NEK7                 | 13  | ROS1                    | 13  |
| AKT2 (PKB beta)       | 5            | EGFR (ErbB1)             | 10  | JAK2 JH1 JH2        | -11 | NEK9                 | -4  | RPS6KA1 (RSK1)          | 1   |
| AKT3 (PKB gamma)      | 19           | EGFR (ErbB1) L858R       | 11  | JAK2 JH1 JH2 V617F  | 4   | NTRK1 (TRKA)         | 33  | RPS6KA2 (RSK3)          | 0   |
| AMPK A1/B1/G1         | 2            | EGFR (ErbB1) L861Q       | 13  | JAK3                | 3   | NTRK2 (TRKB)         | 29  | RPS6KA3 (RSK2)          | 4   |
| AMPK A2/B1/G1         | 16           | EGFR (ErbB1) T790M       | 5   | KDR (VEGFR2)        | 30  | NTRK3 (TRKC)         | 66  | RPS6KA4 (MSK2)          | 11  |
| AURKB (Aurora B)      | 8            | EGFR (ErbB1) T790M L858R | 9   | KIT                 | 13  | PAK2 (PAK65)         | 9   | RPS6KA5 (MSK1)          | 4   |
| AURKC (Aurora C)      | 4            | EPHA1                    | 37  | KIT T670I           | 4   | PAK3                 | -17 | RPS6KA6 (RSK4)          | 0   |
| AXL                   | 6            | EPHA2                    | 21  | LCK                 | 66  | PAK4                 | 4   | RPS6KB1 (p70S6K)        | -23 |
| BLK                   | 50           | EPHA3                    | 4   | LRRK2               | 16  | PAK6                 | 5   | SGK (SGK1)              | 4   |
| BMX                   | 13           | EPHA4                    | 11  | LRRK2 G2019S        | 7   | PAK7 (KIAA1264)      | -4  | SGK2                    | 2   |
| BRAF                  | 9            | EPHA5                    | 16  | LTK (TYK1)          | 9   | PASK                 | 0   | SGKL (SGK3)             | 2   |
| BRAF V599E            | 8            | EPHA8                    | 29  | LYN A               | 63  | PDGFRA (PDGFR alpha) | 50  | SNF1LK2                 | 20  |
| BRSK1 (SAD1)          | 2            | EPHB1                    | 16  | LYN B               | 65  | PDGFRA D842V         | 50  | SRC                     | 12  |
| BTK                   | 13           | EPHB2                    | 15  | MAPK1 (ERK2)        | -1  | PDGFRA T674I         | 8   | SRC N1                  | 23  |
| CAMK1 (CaMK1)         | -14          | EPHB3                    | 10  | MAP2K1 (MEK1)       | 18  | PDGFRA V561D         | 81  | SRMS (Srm)              | 30  |
| CAMK1D (CaMKI delta)  | 8            | EPHB4                    | 9   | MAP2K2 (MEK2)       | 28  | PDGFRB (PDGFR beta)  | 24  | SRPK1                   | -1  |
| CAMK2A (CaMKII alpha) | 2            | ERBB2 (HER2)             | 3   | MAP2K6 (MKK6)       | -3  | PDK1                 | 14  | SRPK2                   | -3  |
| CAMK2B (CaMKII beta)  | 7            | ERBB4 (HER4)             | 5   | MAP3K8 (COT)        | 2   | PHKG1                | 5   | STK22B (TSSK2)          | 1   |
| CAMK2D (CaMKII delta) | 15           | FER                      | -4  | MAP3K9 (MLK1)       | 16  | PHKG2                | 2   | STK22D (TSSK1)          | 1   |
| CAMK4 (CaMKIV)        | 0            | FES (FPS)                | 5   | MAP4K2 (GCK)        | 6   | PIM1                 | -2  | STK23 (MSSK1)           | 5   |
| CDC42 BPA (MRCKA)     | 2            | FGFR1                    | 27  | MAP4K4 (HGK)        | 15  | PIM2                 | 0   | STK24 (MST3)            | -3  |
| CDC42 BPB (MRCKB)     | 2            | FGFR2                    | 36  | MAP4K5 (KHS1)       | 6   | PKN1 (PRK1)          | 0   | STK25 (YSK1)            | 1   |
| CDK1/cyclin B         | -2           | FGFR3                    | 17  | MAPK10 (JNK3)       | -5  | PLK1                 | -1  | STK3 (MST2)             | 1   |
| CDK2/cyclin A         | -7           | FGFR3 K650E              | 37  | MAPK11 (p38 beta)   | 13  | PLK2                 | 3   | STK4 (MST1)             | 3   |
| CDK5/p25              | 4            | FGFR4                    | 32  | MAPK12 (p38 gamma)  | 7   | PLK3                 | -3  | SYK                     | -1  |
| CDK5/p35              | 1            | FGR                      | 76  | MAPK13 (p38 delta)  | 1   | PRKACA (PKA)         | 39  | TAOK2 (TAO1)            | 6   |
| CDK7/cyclin H/MNAT1   | -37          | FLT1 (VEGFR1)            | 5   | MAPK3 (ERK1)        | 6   | PRKCA (PKC alpha)    | 22  | TBK1                    | -4  |
| CHEK1 (CHK1)          | 2            | FLT3                     | 81  | MAPK3 (ERK1)        | 6   | PRKCB1 (PKC beta I)  | 8   | TEK (Tie2)              | -5  |
| CHEK2 (CHK2)          | 15           | FLT3 D835Y               | 25  | MAPK8 (JNK1)        | 12  | PRKCB2 (PKC beta II) | 3   | TYK2                    | 2   |
| CLK1                  | 6            | FLT4 (VEGFR3)            | 20  | MAPK9 (JNK2)        | 4   | PRKCD (PKC delta)    | 2   | TYRO3 (RSE)             | 18  |
| CLK2                  | 5            | FRAP1 (mTOR)             | 101 | MAPKAPK2            | 4   | PRKCE (PKC epsilon)  | 9   | YES1                    | 43  |
| CLK3                  | 3            | FRK (PTK5)               | 36  | MAPKAPK3            | 2   | PRKCG (PKC gamma)    | 23  | ZAP70                   | 2   |
| CSF1R (FMS)           | 76           | FYN                      | 55  | MAPKAPK5 (PRAK)     | 1   | PRKCH (PKC eta)      | 6   |                         |     |
| CSK                   | 23           | GRK4                     | -3  | MARK1 (MARK)        | 9   | PRKCI (PKC iota)     | 4   |                         |     |
| CSNK1A1 (CK1 alpha 1) | 13           | GRK5                     | 4   | MARK2               | 13  | PRKCN (PKD3)         | 17  |                         |     |
| CSNK1D (CK1 delta)    | 73           | GRK6                     | -5  | MARK3               | 6   | PRKCQ (PKC theta)    | 4   |                         |     |
| CSNK1E (CK1 epsilon)  | 87           | GRK7                     | -2  | MARK4               | 13  | PRKCZ (PKC zeta)     | 1   |                         |     |
| CSNK1G1 (CK1 gamma 1) | 2            | GSK3A (GSK3 alpha)       | 5   | MATK (HYL)          | 3   | PRKD1 (PKC mu)       | 21  |                         |     |
|                       |              | GSK3B (GSK3 beta)        | -2  | MET (cMet)          | 7   | PRKD2 (PKD2)         | 11  |                         |     |
|                       |              |                          |     | MELK                | 32  | PRKG1                | 4   |                         |     |

**Supplementary Figure 13. INK128 screened against 243 kinases.** INK128 was screened against a panel of 243 kinases using the Invitrogen SelectScreen™ kinase profiling service. The values indicate percent inhibition at 1 μM of INK128.



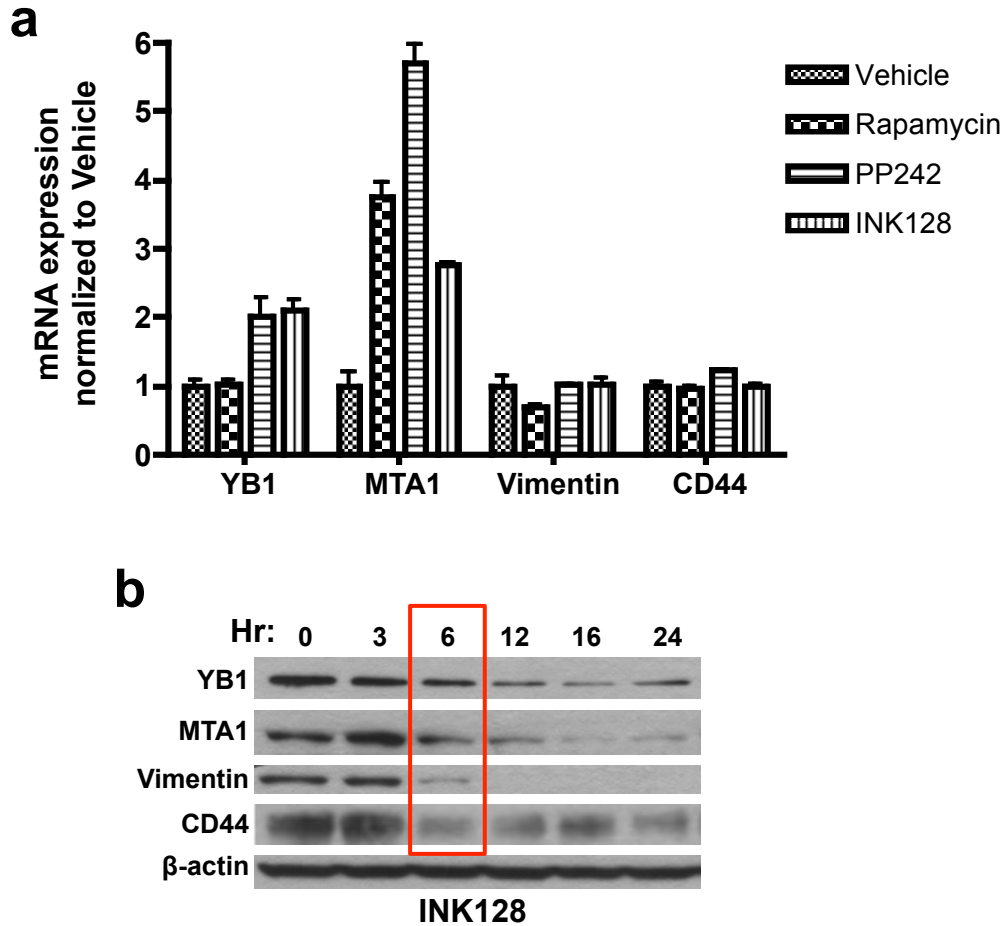

**Supplementary Figure 14. ATP site inhibition of mTOR does not reduce transcript levels of the 4 invasion genes. INK128 time course.** (a) mRNA expression of *YB1*, *MTA1*, vimentin, and *CD44*, relative to  $\beta$ -actin upon treatment with rapamycin (50 nM), PP242 (2.5  $\mu$ M), or INK128 (200 nM) for 48 hours in PC3 cells (mean  $\pm$  SEM, n = 3). (b) Representative western blot of 3 independent experiments showing a time course of invasion gene expression before and after treatment with INK128 (200 nM) in PC3 cells.

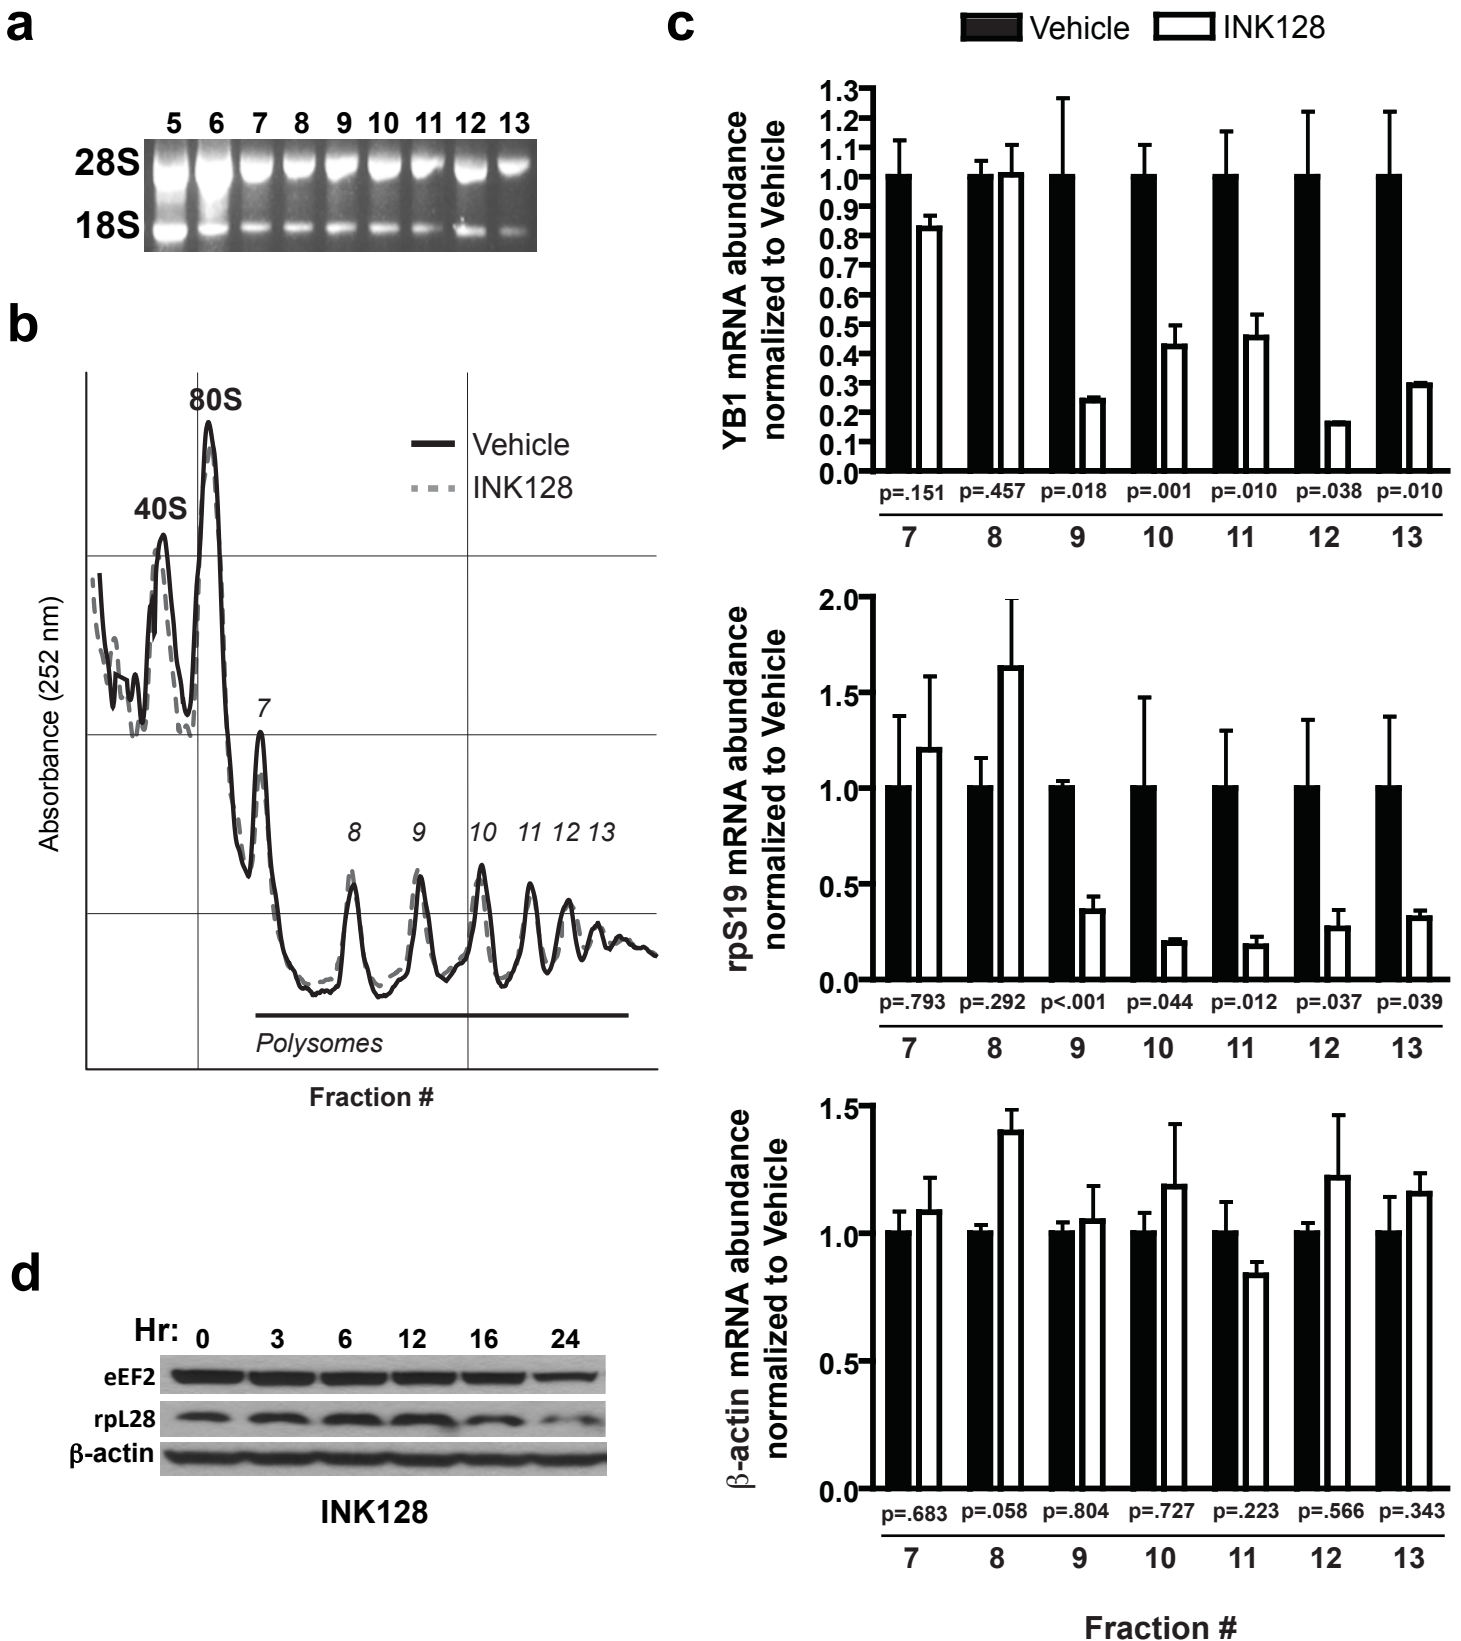

**Supplementary Figure 15. Polysome analysis after 3-hour INK128 treatment.** (a) Ethidium bromide staining of rRNA species in individual fractions. Fractions 7-13 were determined to be polysome-associated fractions. (b) Overlay of polysome profiles from PC3 cells treated with vehicle (solid line) or INK128 (100 nM) (dotted line). (c) qPCR analysis of *YB1* and *rpS19* mRNAs that show differential association in polysome fractions after INK128 (100 nM) treatment (mean  $\pm$  SEM, n = 6). The bottom graph shows that there is no change in  $\beta$ -actin mRNA association in polysome fractions between treatments. P-values (t-test) for each polysome fraction are shown. (d) Representative western blot of 3 independent experiments showing a time course of eEF2 and rpL28 expression before and after treatment with INK128 (200 nM) in PC3 cells.

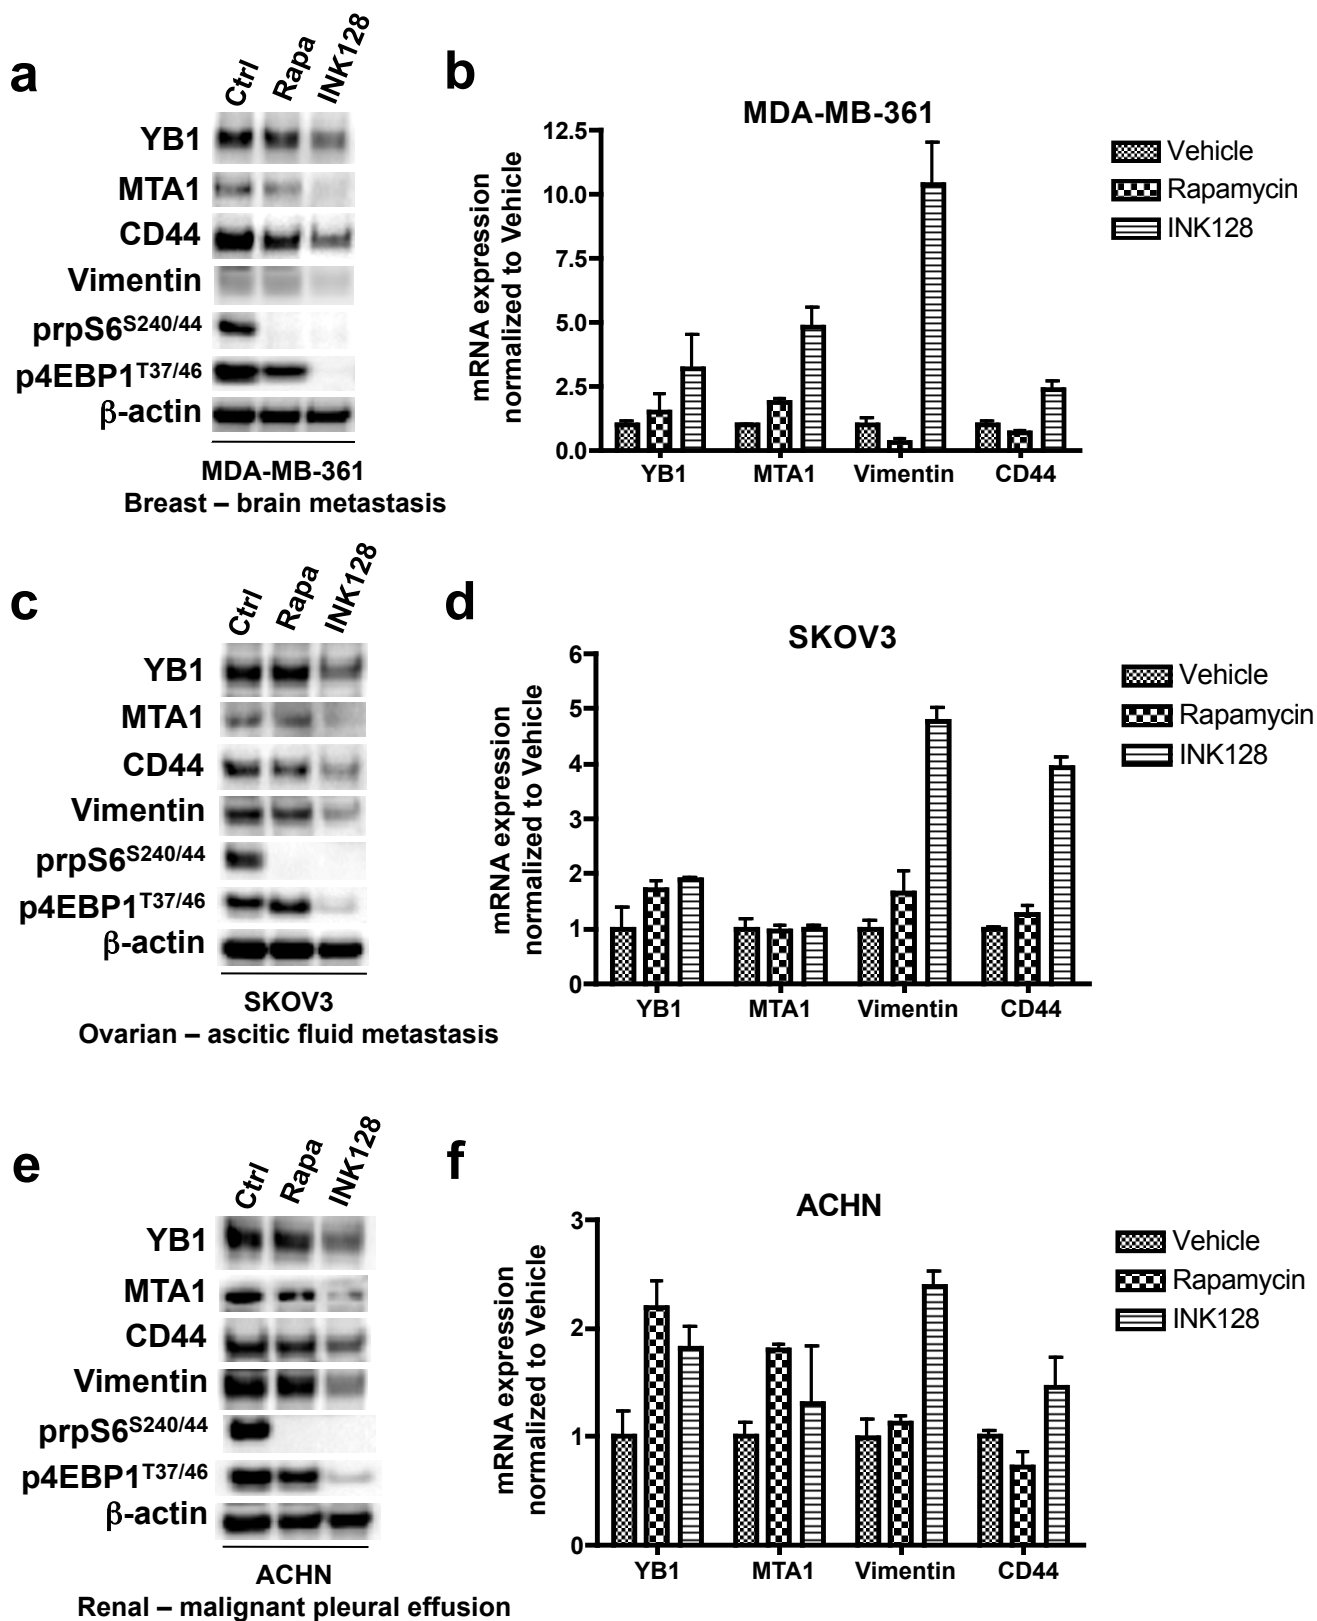

**Supplementary Figure 16. 4-gene invasion signature is responsive to INK128 but not rapamycin in metastatic cell lines.** (a-b) Representative western blot (a) and qPCR analysis (b) of MDA-MB-361 cells after 48-hour treatment with INK128 (200 nM). (c-d) Representative western blot (c) and qPCR analysis (d) of SKOV3 cells after 48-hour treatment with INK128 (200 nM). (e-f) Representative western blot (e) and qPCR analysis (f) of ACHN cells after 48-hour treatment with INK128 (200 nM). Westerns = representative western blot of 2 independent experiments. QPCR – n = 3. All data represent mean ± SEM.

**a**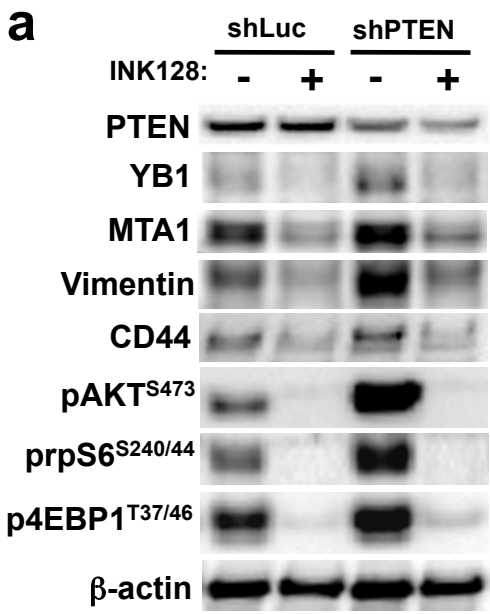**b**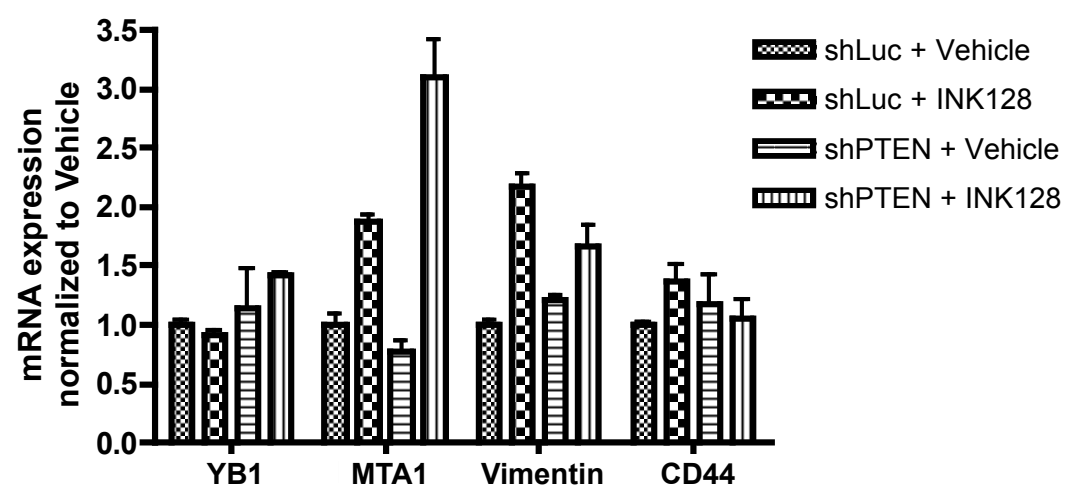

**Supplementary Figure 17. *PTEN* gene silencing in the A498 *PTEN* positive renal carcinoma cell line induces the post-transcriptional expression of the 4-gene invasion signature.** (a-b) Representative western blot (a) and qPCR analysis (b) of A498 cells after stable silencing of *PTEN* and 24 hour INK128 treatment (200 nM). Western = representative western blot of 2 independent experiments. QPCR - n = 3. All data represent mean  $\pm$  SEM.



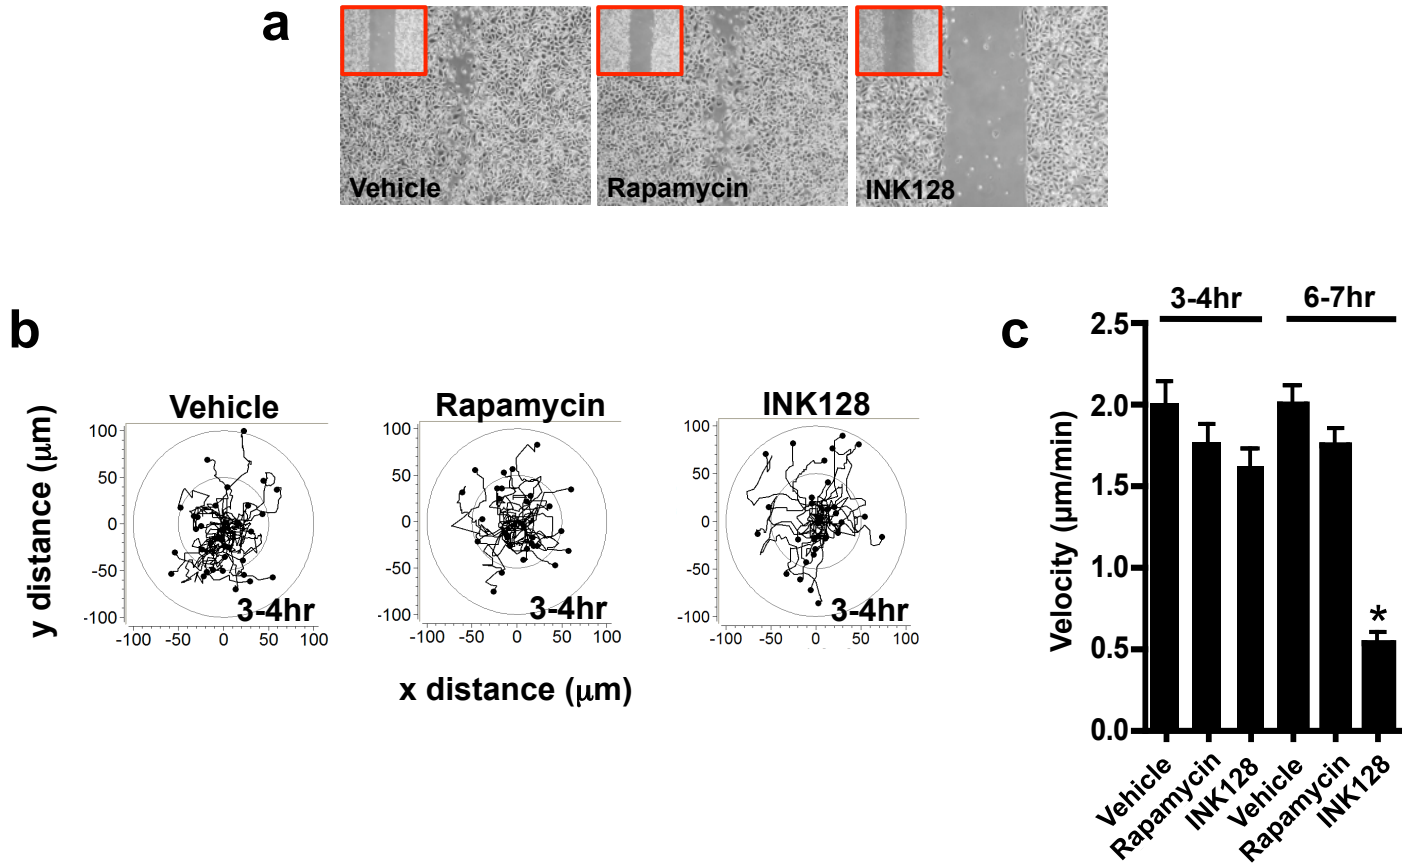

**Supplementary Figure 18. INK128 inhibits cell migration in PC3 prostate cancer cells as early as 6 hours after drug treatment.** (a) Representative wound healing assay of 3 independent experiments in PC3 cells treated with rapamycin (50 nM) or INK128 (200 nM) for 40 hours. Inset (red box) represents wound at 0 hours. (b) Migration patterns of individual GFP-labeled PC3 cells during hours 3-4 after treatment with rapamycin or INK128 (34 cells per condition). (c) Average velocity of GFP-labeled PC3 cells during hours 3-4 or 6-7 after treatment with rapamycin 50 nM or INK128 200 nM (mean  $\pm$  SEM, n = 34 cells per condition, \* P<0.001, ANOVA).

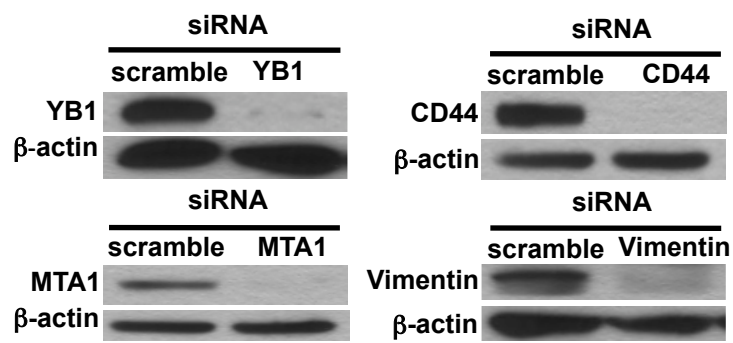

**Supplementary Figure 19. Knockdown of the 4 invasion genes in PC3 prostate cancer cells.** YB1, CD44, MTA1, and Vimentin protein levels after 48 hours of gene silencing in PC3 cells.

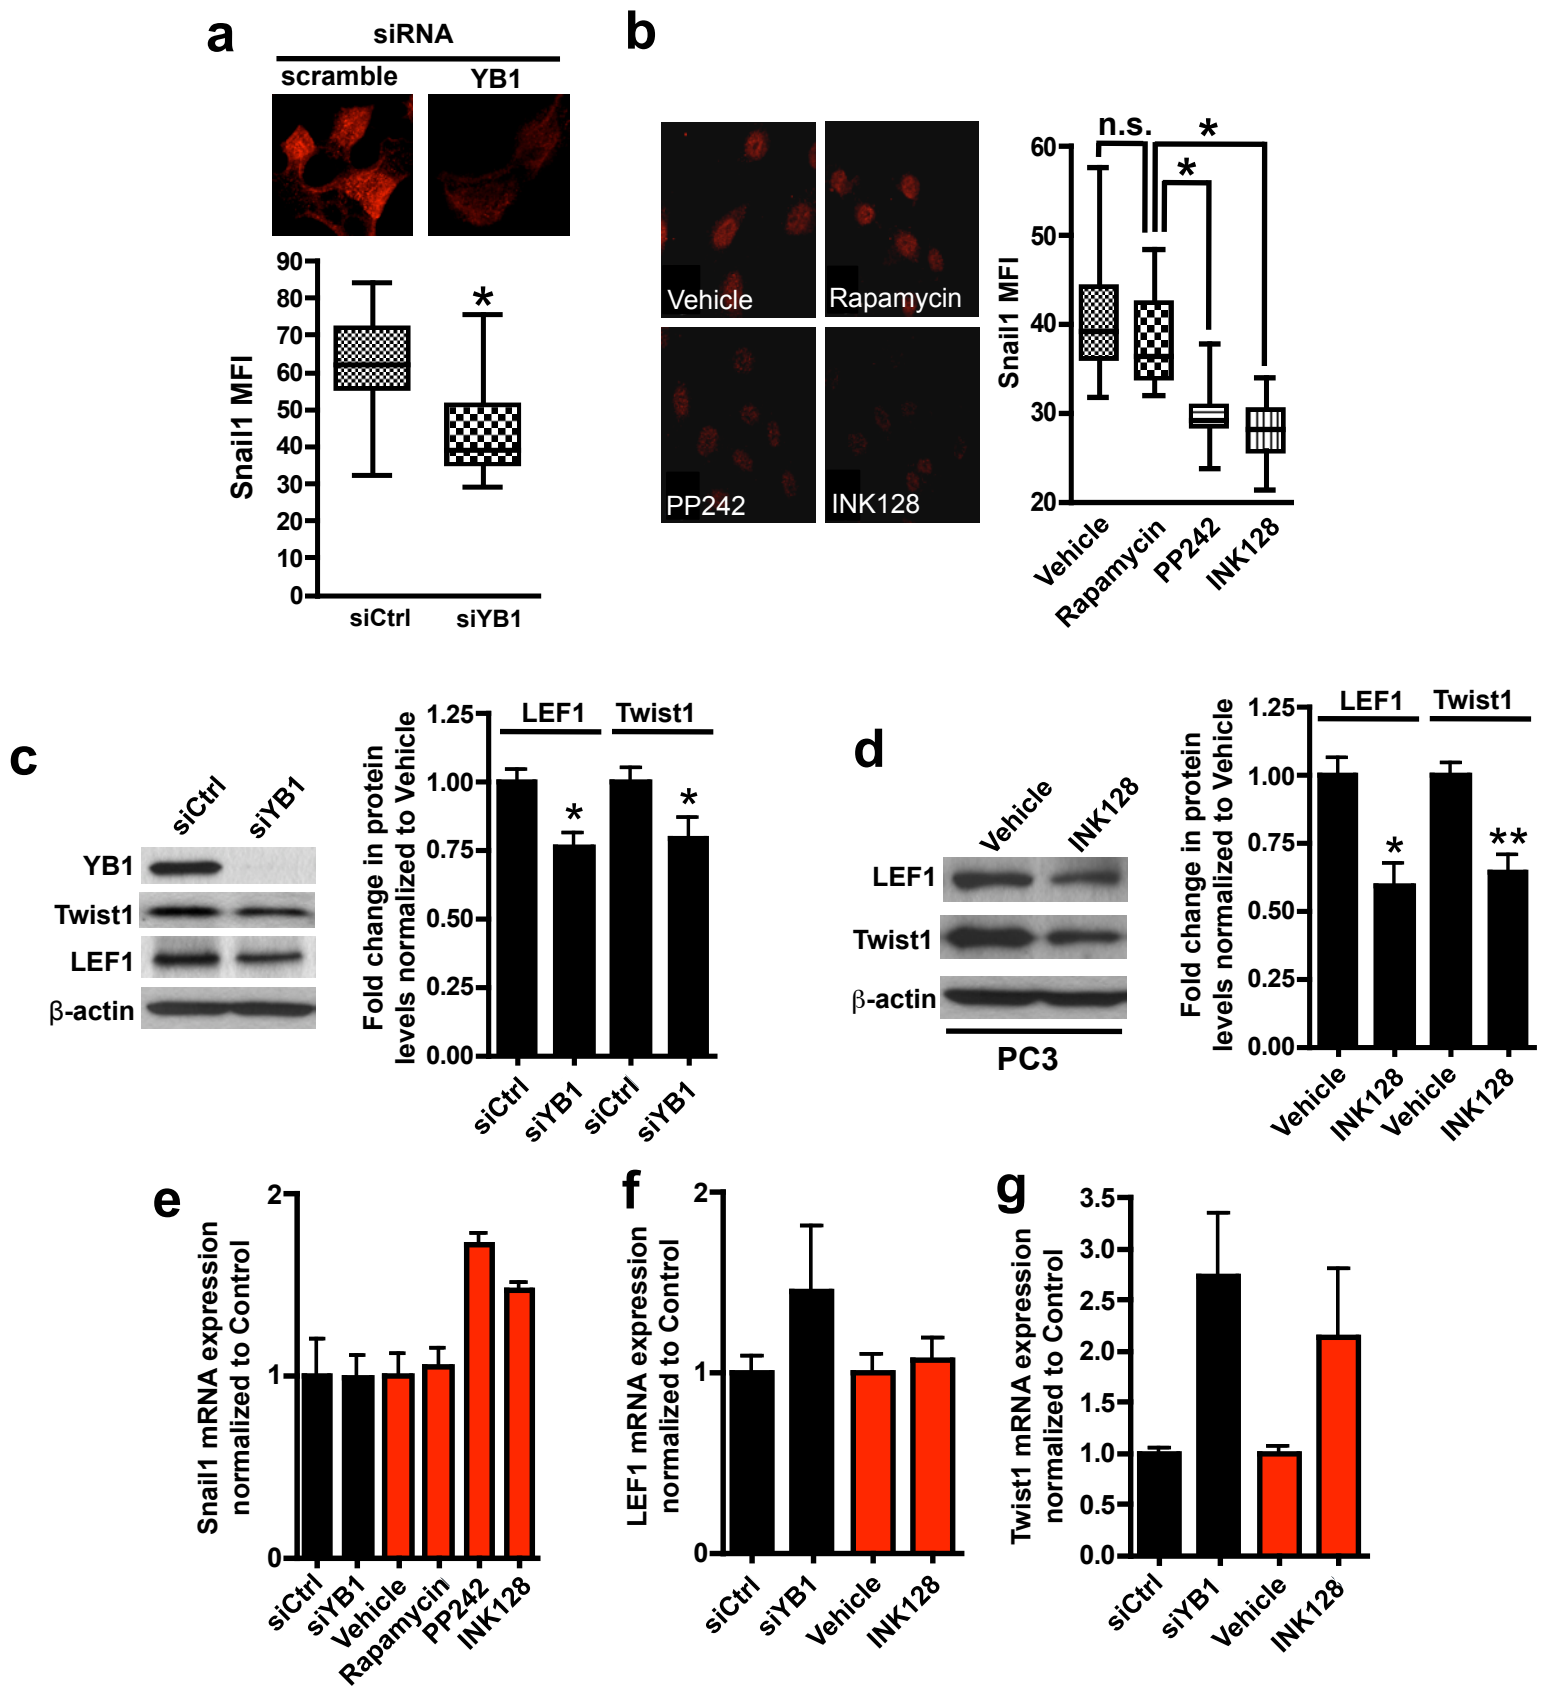

**Supplementary Figure 20. YB1 knockdown and ATP site inhibition of YB1 of mTOR decreases the protein levels but not mRNA levels of YB1 target genes.** (a) Snail1 immunofluorescence in PC3 cells after 48 hours of YB1 gene silencing. Representative Snail1 immunofluorescence (top panels), box plot of Snail1 mean fluorescence intensity per cell (MFI)(n = 26 siCtrl cells, n = 15 siYB1 cells, \* P = 0.001, t-test)(bottom panel). (b) Snail1 immunofluorescence in PC3 cells after treatment with rapamycin (50 nM), PP242 (2.5  $\mu$ M), or INK128 (200 nM). Representative Snail1 immunofluorescence (left panel), box plot of Snail1 mean fluorescence intensity per cell (MFI)(n = 16 vehicle treated cells, n = 26 rapamycin treated cells, n = 28 PP242 treated cells, n = 27 INK128 treated cells, \* P < 0.05, ANOVA)(right panel). (c) Representative western blot (left panel) and quantification of protein levels (right panel) for LEF1 and Twist1 after YB1 gene silencing (mean  $\pm$  SEM, n = 6, \* P < 0.05, t-test). (d) Representative western blot (left panel) and quantification of protein levels (right panel) for LEF1 and Twist1 after INK128 treatment (mean  $\pm$  SEM, n = 6, \* P < 0.005, t-test). (e-g) Snail1 (e), LEF1 (f), or Twist1 (g) mRNA expression normalized to  $\beta$ -actin after YB1 gene knockdown or treatment with rapamycin (50nM), PP242 (2.5  $\mu$ M) or INK128 (200 nM) in PC3 cells (mean  $\pm$  SEM, n = 3).

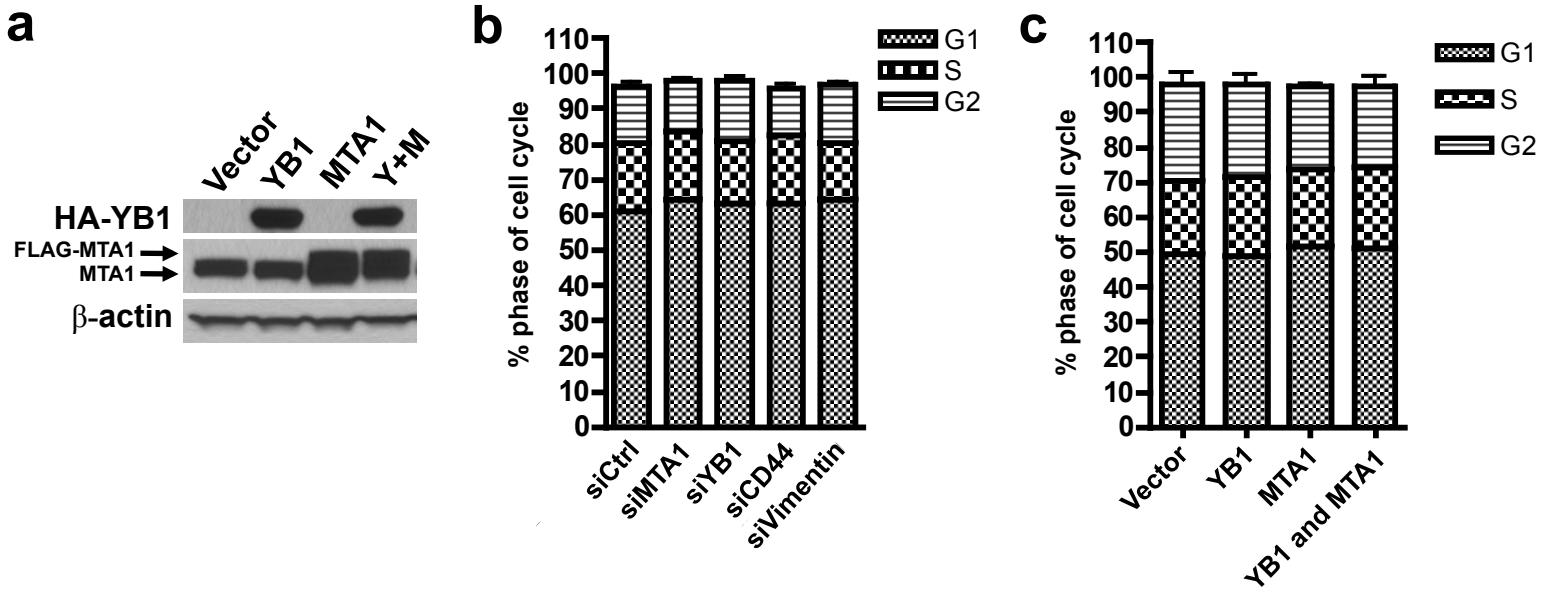

**Supplementary Figure 21. Effects of invasion gene knockdown or over expression in PC3 and BPH-1 cells, respectively on the cell cycle.** (a) HA-YB1 and Flag-MTA1 protein levels after 48 hours of over expression in non-transformed BPH-1 prostate epithelial cells (Y = YB1, M = MTA1). (b) Cell cycle analysis in PC3 cells after knockdown of respective genes (mean  $\pm$  SEM, n = 3). (c) Cell cycle analysis upon over expression of YB1 and/or MTA1 in BPH-1 cells. (mean  $\pm$  SEM, n = 3).

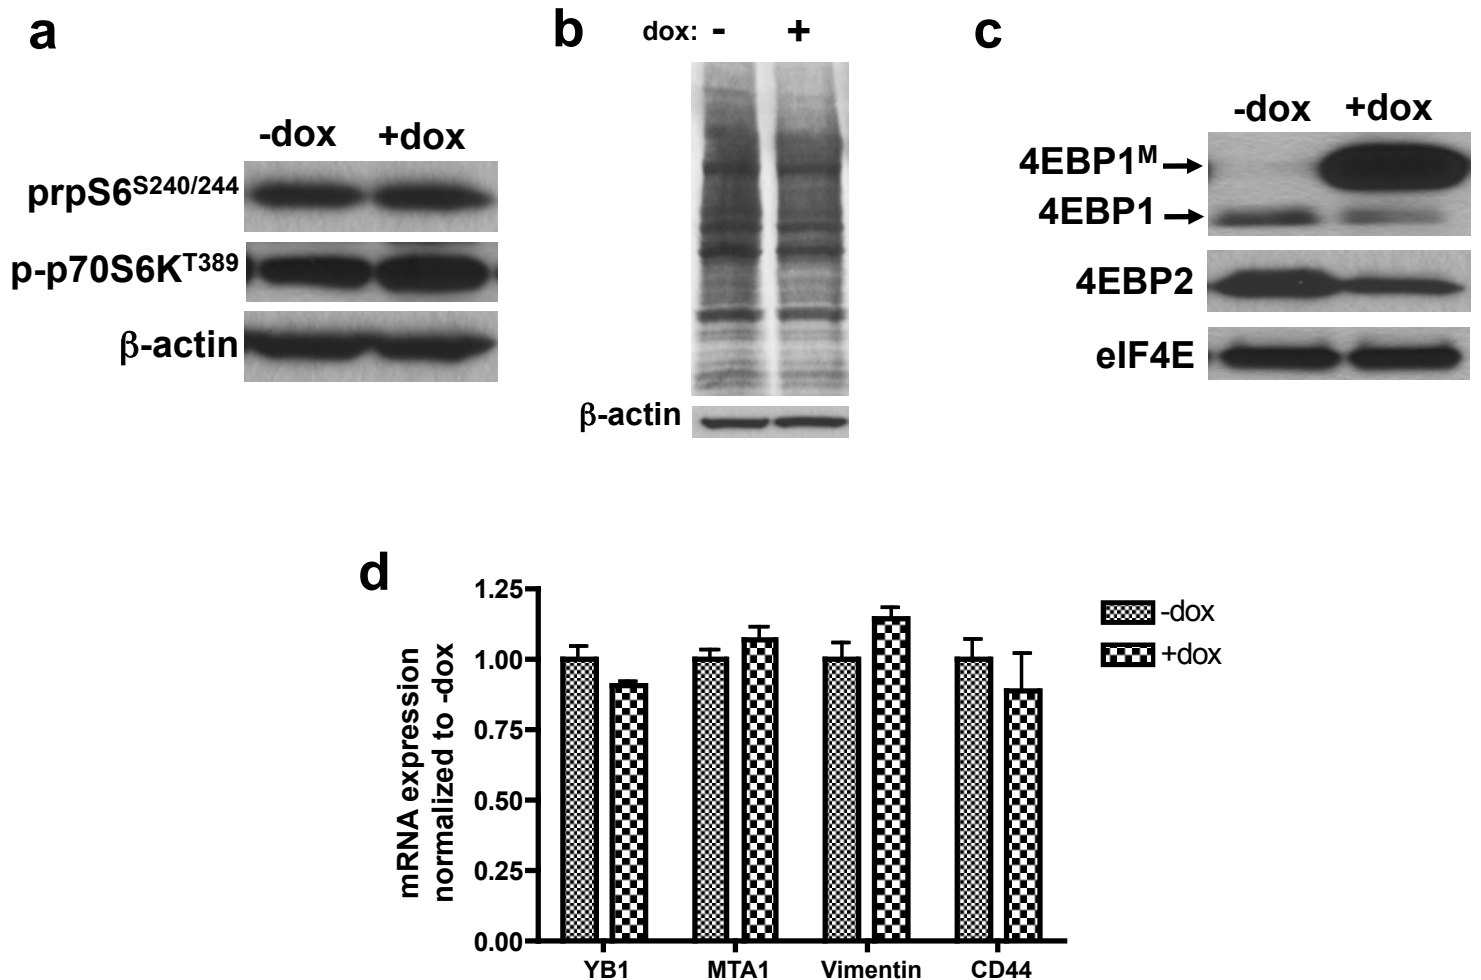

**Supplementary Figure 22. The 4EBP1<sup>M</sup> does not augment mTORC1 function or global protein synthesis in PC3 cells.** (a) Representative western blot from 3 independent experiments of phospho-p70S6K<sup>T389</sup> and phospho-rpS6<sup>S240/244</sup> after a 48-hour treatment with and without 1 μg/ml doxycycline in PC3-4EBP1<sup>M</sup> cells. (b) Representative [<sup>35</sup>S]-methionine incorporation from 2 independent experiments in PC3-4EBP1<sup>M</sup> cells (48 hours, doxycycline 1 μg/mL)(mean + SEM). (c) Representative cap-binding assay from 2 independent experiments after 48-hour treatment with 1 μg/ml doxycycline in PC3-4EBP1<sup>M</sup> cells. (d) mRNA expression of *YB1*, *MTA1*, *Vimentin*, and *CD44* relative to β-actin after 48-hour treatment with 1 μg/ml doxycycline in PC3-4EBP1<sup>M</sup> cells (mean ± SEM, n = 3).

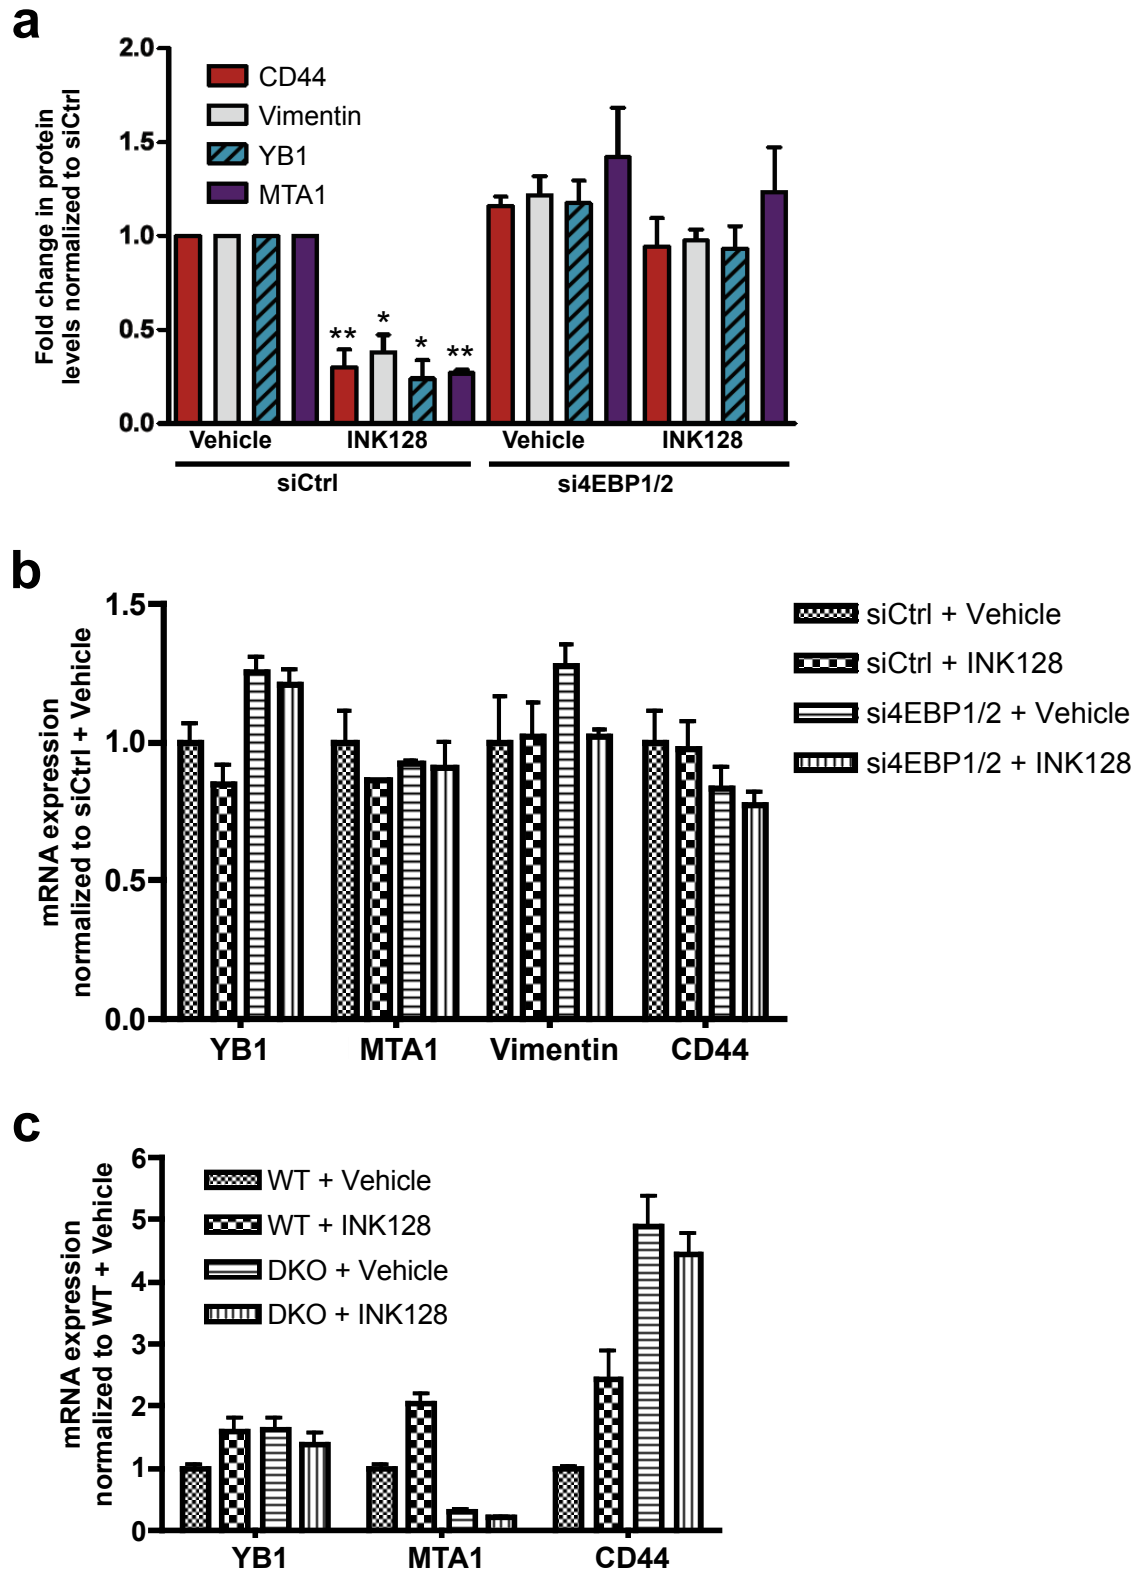

**Supplementary Figure 23. The 4EBP/eIF4E axis imparts sensitivity to mTOR ATP site inhibition.** (a) Quantification of western blots from 3 independent experiments of PC3 cells after 48 hours of *4EBP1/4EBP2* knockdown followed by 24-hour INK128 treatment. (n = 3, \* p<0.05, \*\* p<0.01, ANOVA). (b) mRNA expression of *YB1*, *MTA1*, vimentin, and *CD44* relative to  $\beta$ -actin after 48 hours of gene silencing of *4EBP1* and *4EBP2* followed by a 24-hour INK128 treatment (200 nM)(mean  $\pm$  SEM, n = 3). (c) mRNA expression of *YB1*, *MTA1*, and *CD44* in WT and *4EBP1/4EBP2* DKO MEFs treated with 200 nM INK128 for 24 hours (mean  $\pm$  SEM, n = 3).



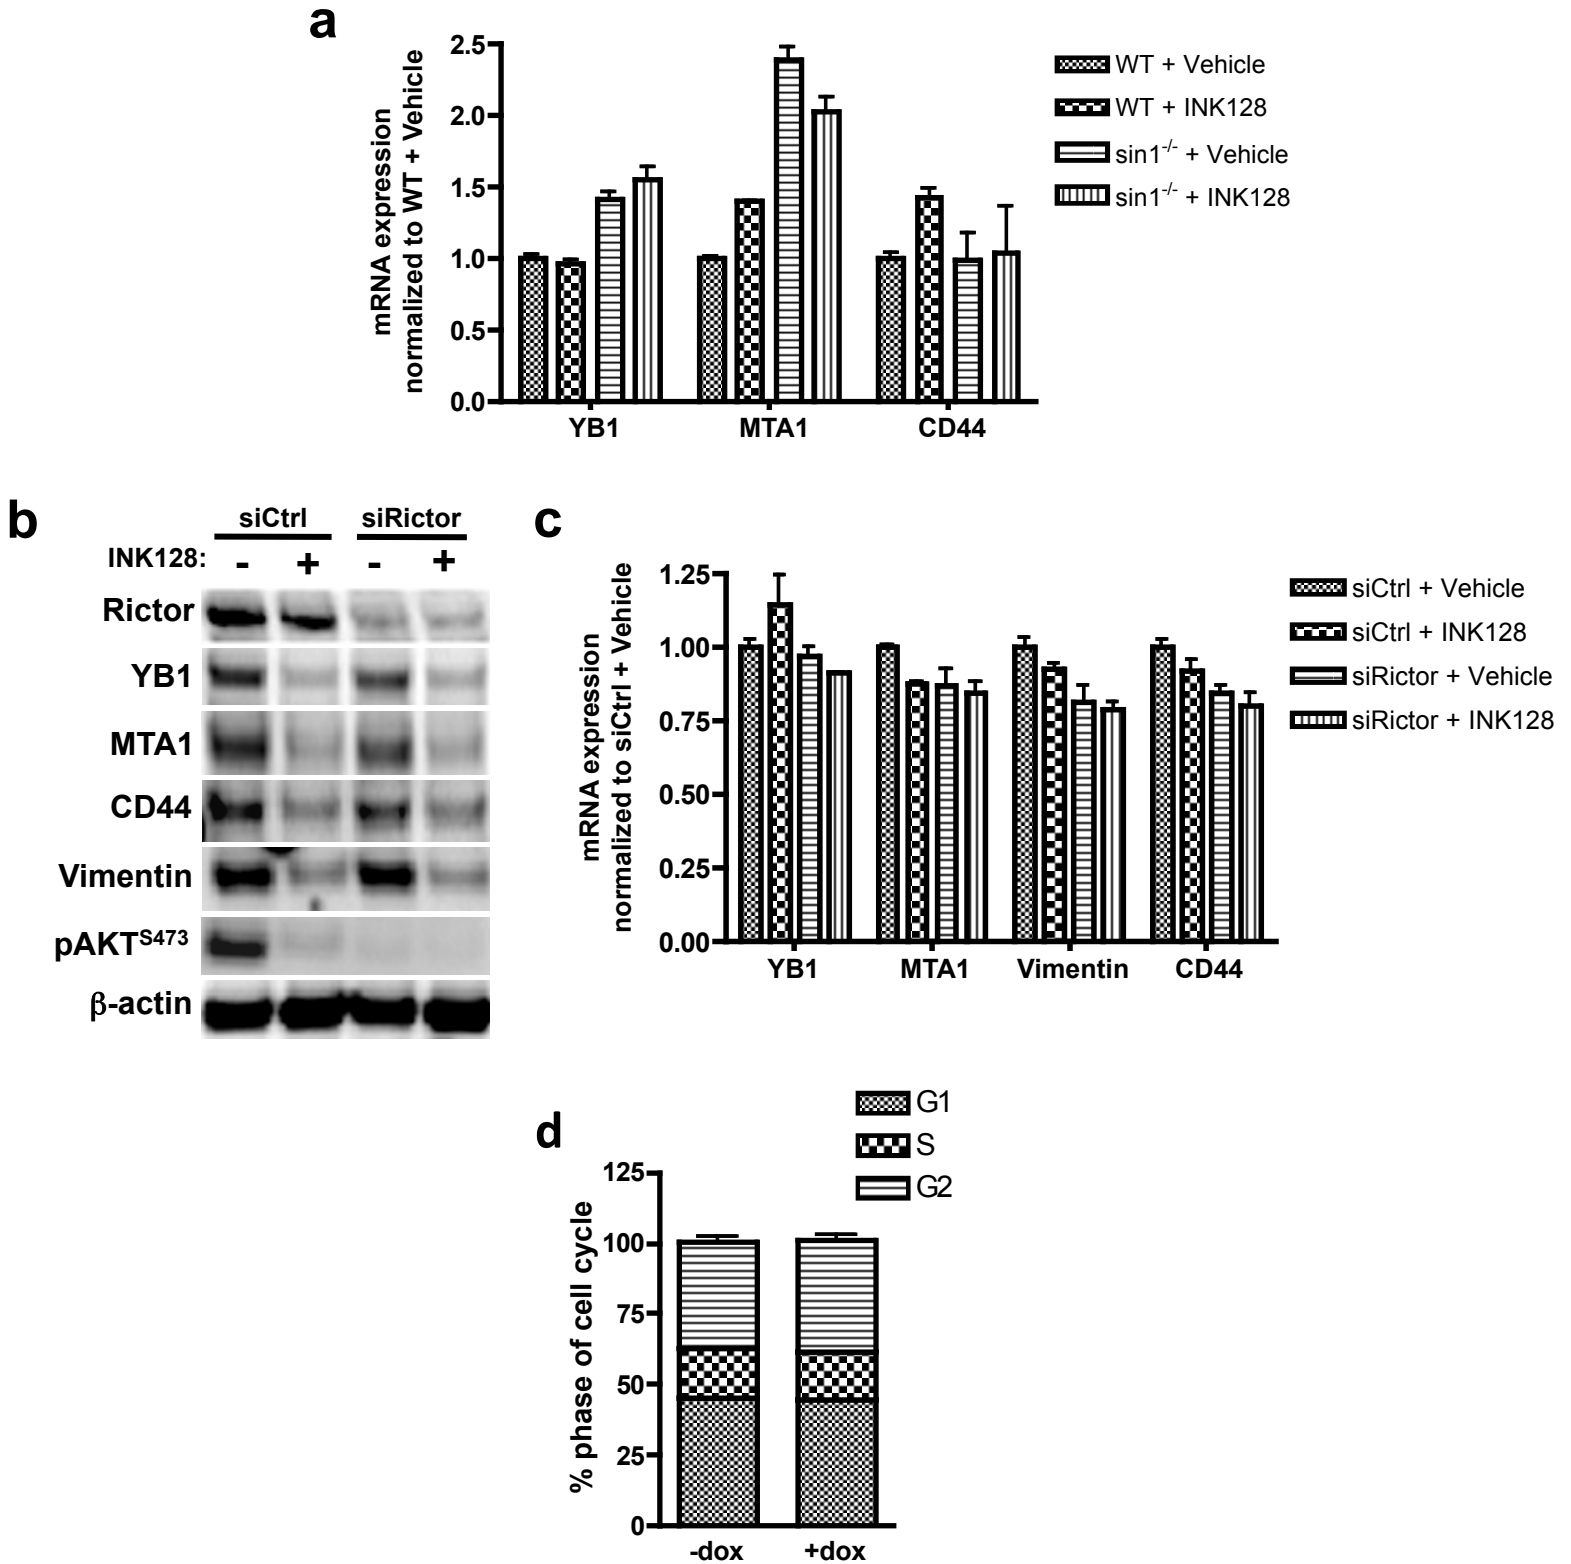

**Supplementary Figure 24. mTORC2 does not control the expression of the 4-gene invasion signature.** (a) mRNA expression of *YB1*, *MTA1*, and *CD44* relative to  $\beta$ -actin after a 24-hour treatment with INK128 (200 nM) in *mSin1*<sup>-/-</sup> MEFs (mean  $\pm$  SEM, n = 3). (b) Representative western blot analysis from 2 independent experiments of PC3 prostate cancer cells after 48 hours of *rictor* gene silencing followed by a 24-hour treatment with INK128 (200 nM). (c) mRNA expression of *YB1*, *MTA1*, vimentin, and *CD44* relative to  $\beta$ -actin in PC3 prostate cancer cells after 48 hours of *rictor* gene silencing followed by a 24-hour treatment with INK128 (200 nM) in PC3. (mean  $\pm$  SEM, n = 3). (d) Cell cycle analysis of PC3-4EBP1<sup>M</sup> cells after treatment with 1  $\mu$ g/ml doxycycline for 48 hours (mean  $\pm$  SEM, n = 3).

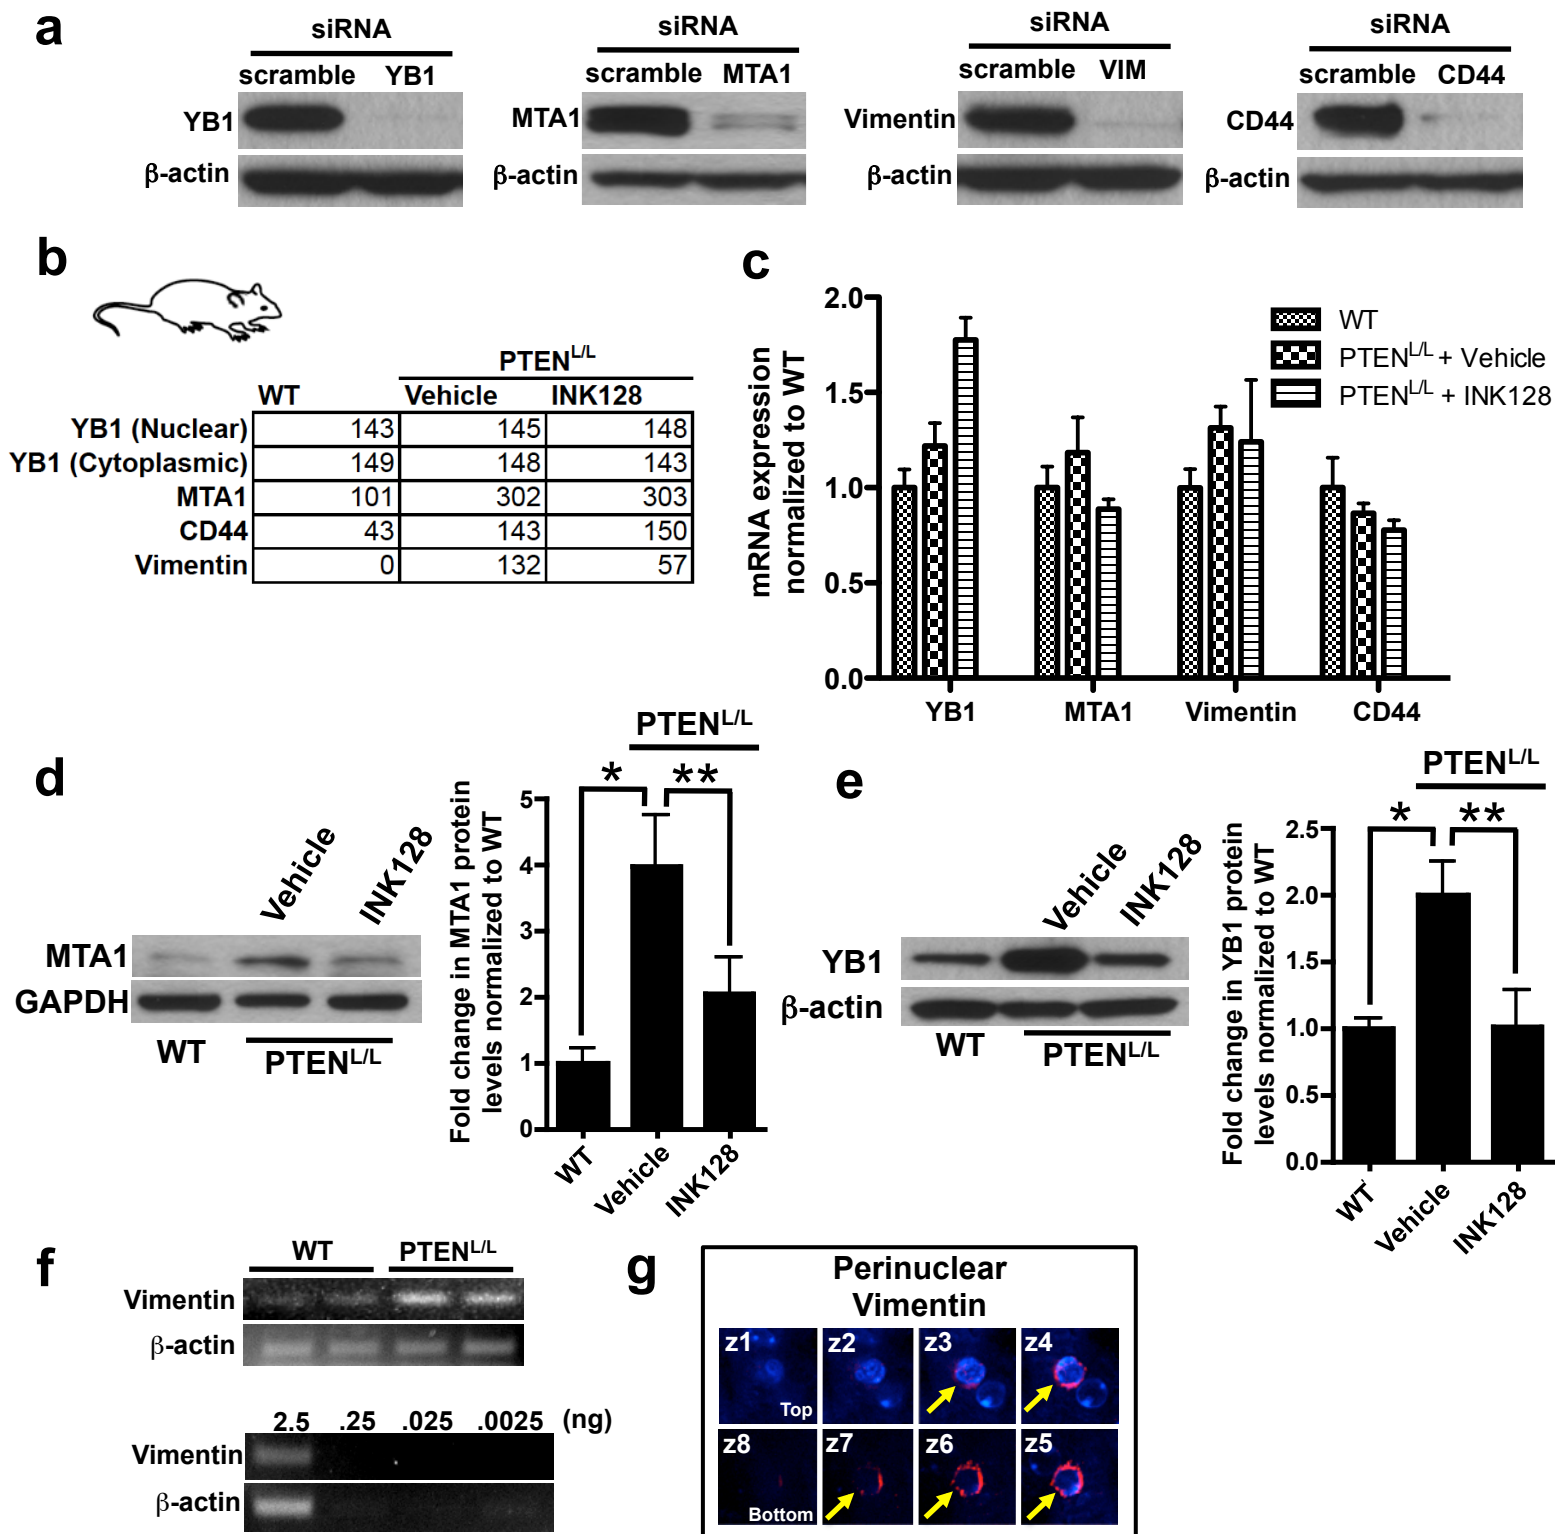

**Supplementary Figure 25. Complete mTOR inhibition decreases the expression of the 4-gene invasion signature at the level of translational control *in vivo* in *PTEN<sup>L/L</sup>* mice.** (a) Validation of antibodies used for immunofluorescence after 48-hour gene silencing of respective genes in PC3 cells. (b) Number of individual CK5+ and/or CK8+ cells measured in 3 separate mice for mean fluorescence intensity of respective protein targets in WT and *PTEN<sup>L/L</sup>* mouse prostates. (c) mRNA expression of *YB1*, *MTA1*, vimentin, and *CD44* relative to  $\beta$ -actin in WT and *PTEN<sup>L/L</sup>* mice after 28 days of treatment with INK128 (1 mg/kg daily) (mean  $\pm$  SEM, n = 3 mice/arm). (d) Representative western blot of MTA1 from whole prostate tissue in WT and *PTEN<sup>L/L</sup>* mice after 28 days of treatment with INK128 (1 mg/kg daily) (left panel) and quantitation relative to  $\beta$ -actin protein levels (right panel) (mean  $\pm$  SEM, n = 3 mice/arm, \* P=0.02, \*\* P=0.04, t-test) (e) Representative western blot of YB1 from whole prostate tissue in WT and *PTEN<sup>L/L</sup>* mice after 28 days of treatment with INK128 (1 mg/kg daily) (left panel) and quantitation relative to  $\beta$ -actin protein levels (right panel) (mean  $\pm$  SEM, n = 4 mice/arm, \* P=0.002, \*\* P=0.04, t-test) (f) Semi-quantitative RT-PCR of vimentin and  $\beta$ -actin for WT and *PTEN<sup>L/L</sup>* FACS sorted murine prostate luminal epithelial cells (top panel). RT-PCR of a serial dilution of WT prostate luminal epithelial cell (bottom panel) (g) Z-series of perinuclear vimentin in a *PTEN<sup>L/L</sup>* CK8+ prostate epithelial cell (red – vimentin, blue – DAPI, 0.4  $\mu$ m per section, yellow arrows point to perinuclear vimentin).

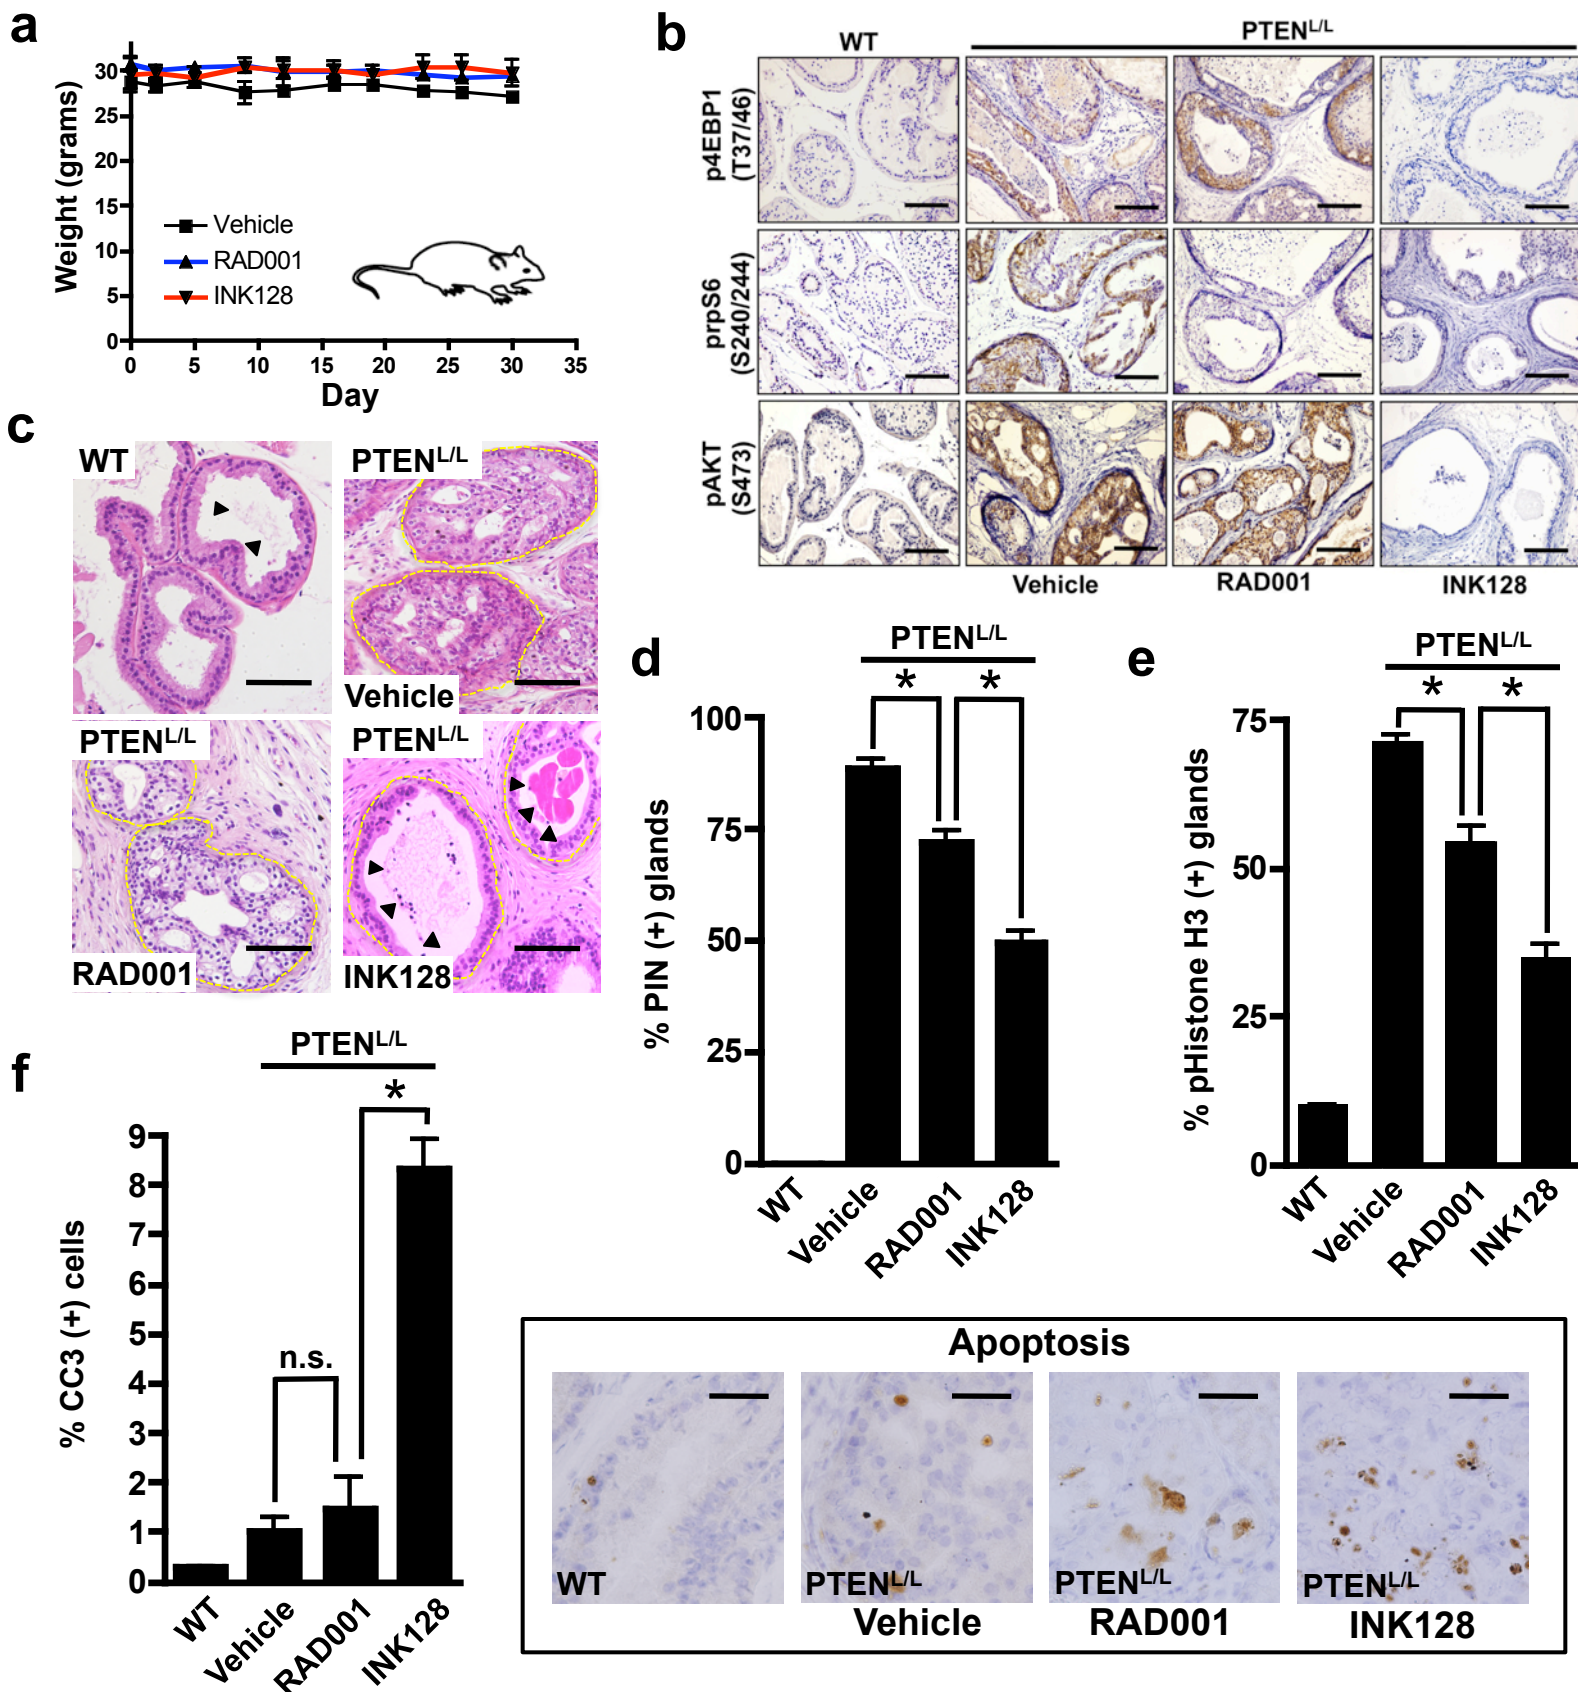

**Supplementary Figure 26. Preclinical efficacy of complete mTOR blockade *in vivo*** (a) Mouse weights measured every 3 days over the course of the preclinical trial (mean  $\pm$  SEM,  $n = 3$ /arm). (b) Representative phospho-specific immunohistochemistry of downstream mTOR targets in the ventral prostate (VP) of 9-month-old WT or *PTEN*<sup>L/L</sup> mice after 28 days of treatment with INK128 (1 mg/kg daily) or RAD001 (10 mg/kg daily) ( $n = 6$  mice/treatment arm). Scale bar = 100  $\mu$ m. (c) Representative histology of 9-month-old WT or *PTEN*<sup>L/L</sup> mice VP after 28 days of treatment with vehicle, RAD001 (10 mg/kg daily), or INK128 (1 mg/kg daily). Yellow dotted lines encircle prostate glands. Black triangles refer to prostatic secretions. Scale bar = 50  $\mu$ m. (d) Quantification of PIN+ glands in treated mice (mean  $\pm$  SEM,  $n = 6$  mice/arm, \*  $P < 0.001$ , ANOVA). (e) Proliferation measured by phospho-histone H3 positive glands in the prostates of 9-month-old WT or *PTEN*<sup>L/L</sup> mice treated with RAD001 (10 mg/kg daily) or INK128 (1 mg/kg daily) (mean  $\pm$  SEM,  $n = 3$  mice/arm, \*  $P < 0.01$ , ANOVA). (f) Apoptosis measured by cleaved caspase 3 (CC3) positive cells in the prostates of 9-month-old WT or *PTEN*<sup>L/L</sup> mice treated with RAD001 (10 mg/kg daily) or INK128 (1 mg/kg daily) (mean  $\pm$  SEM,  $n = 3$  mice/arm, \*  $P < 0.01$ , ANOVA) (Left panel). Representative CC3 images (right panel). Scale bar = 25  $\mu$ m.

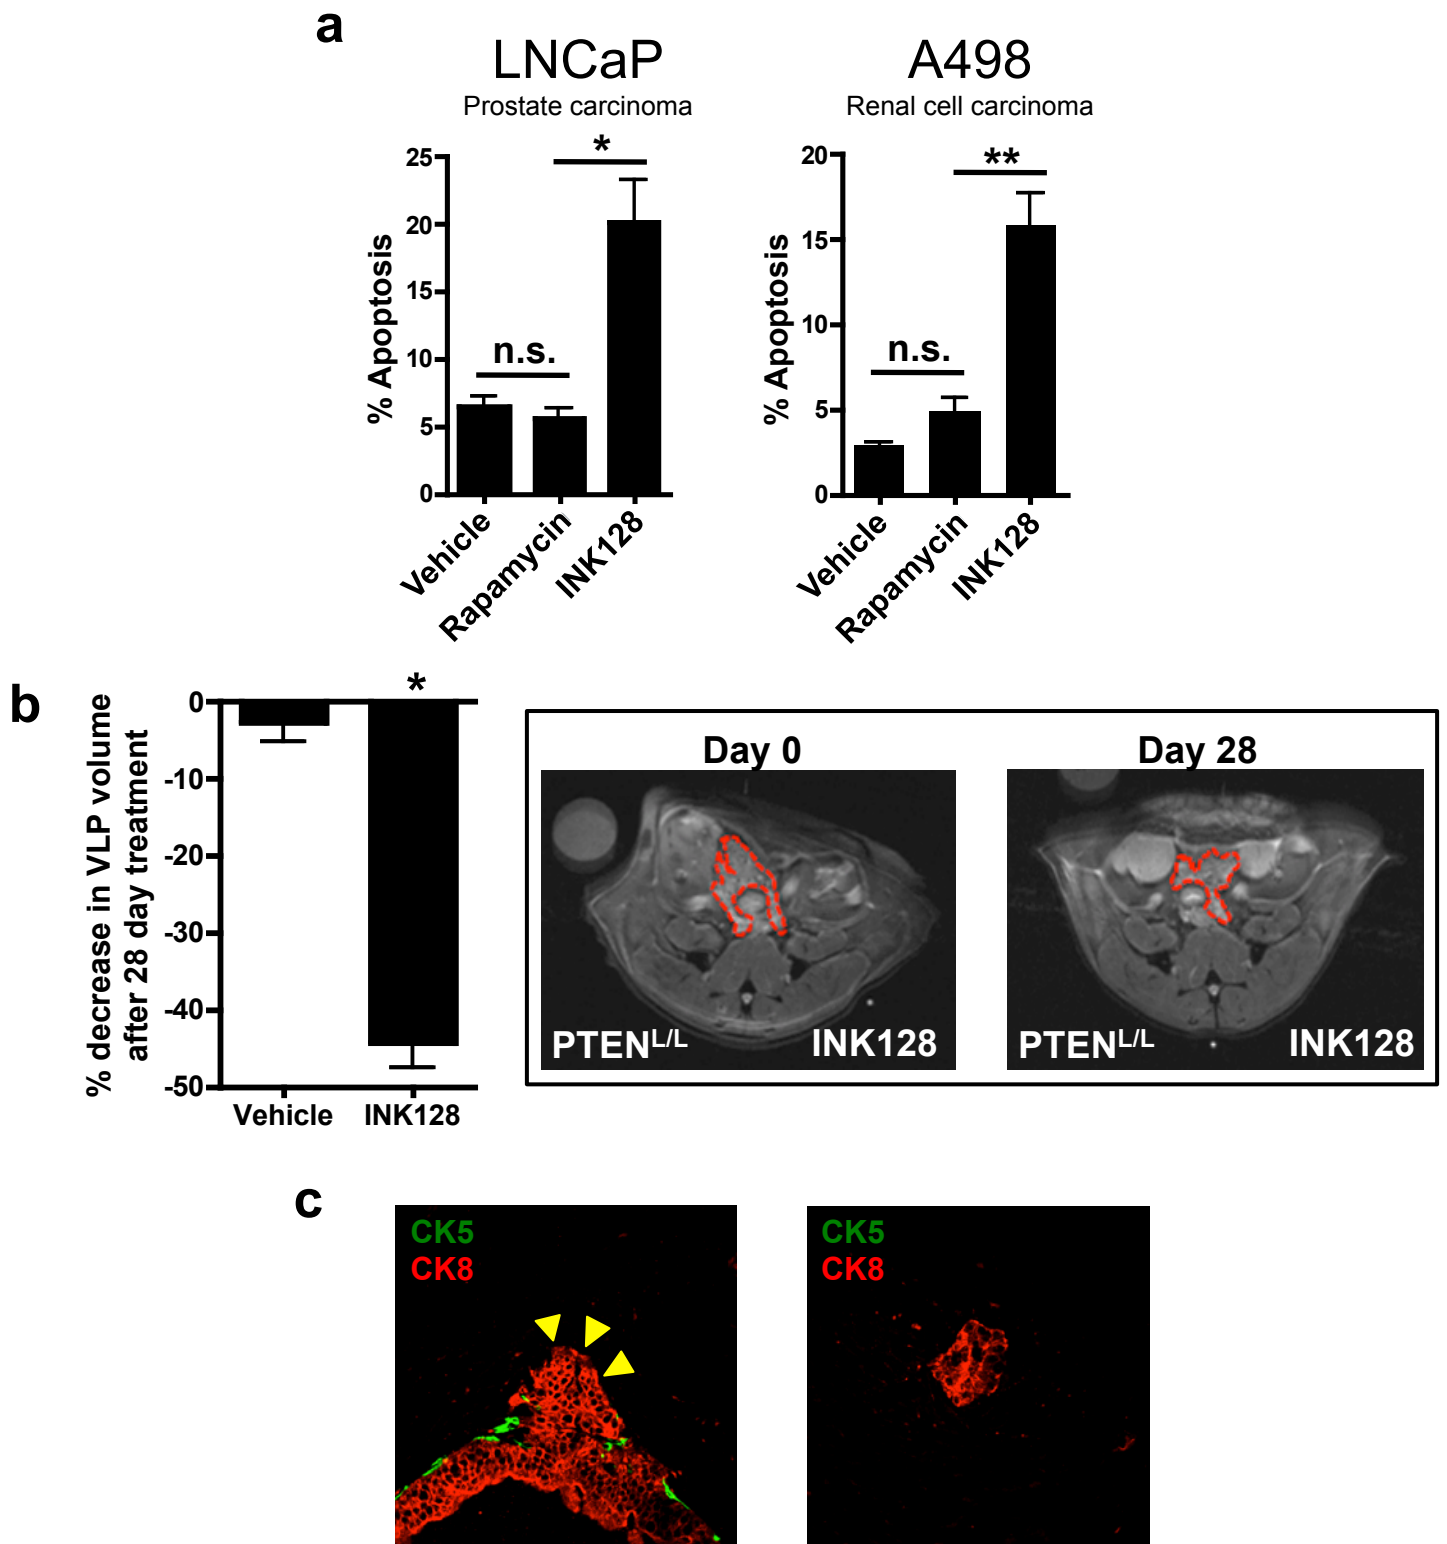

**Supplementary Figure 27. INK128 induces apoptosis in specific cancer cell lines and decreases primary prostate cancer volume *in vivo*.** (a) Apoptosis in LNCaP (n = 3) and A498 (n = 2) cancer cells after treatment with rapamycin (50 nM), or INK128 (200 nM) for 48 hours (mean  $\pm$  SEM, \* P<0.001, \*\* P<0.05, ANOVA, n.s. = not statistically significant). (b) Percentage decrease in ventral and lateral prostate volume in 9-month-old *PTEN<sup>L/L</sup>* after a 28-day treatment with vehicle or INK128 (1mg/kg daily) measured by MRI (left panel)(mean  $\pm$  SEM, n = 4 mice/arm, \* P = 0.0008, t-test). Representative MRI images of the *PTEN<sup>L/L</sup>* ventral and lateral prostate on day 0 and day 28 of treatment with INK128 (right panel)(red dotted lines encircle the ventral and lateral prostate). (c) Additional images of prostate cancer invasion in the *PTEN<sup>L/L</sup>* prostate (14-month-old mouse).
